# Supplementary material for: Penicibrocazines A–E, Five New Sulfide Diketopiperazines from the Marine-Derived Endophytic Fungus Penicillium brocae
Source: MDPI journal article supplement (doi:10.3390/md13010276), 2015-01-07
Supplement: s1 [file s1]

## Supplementary Information

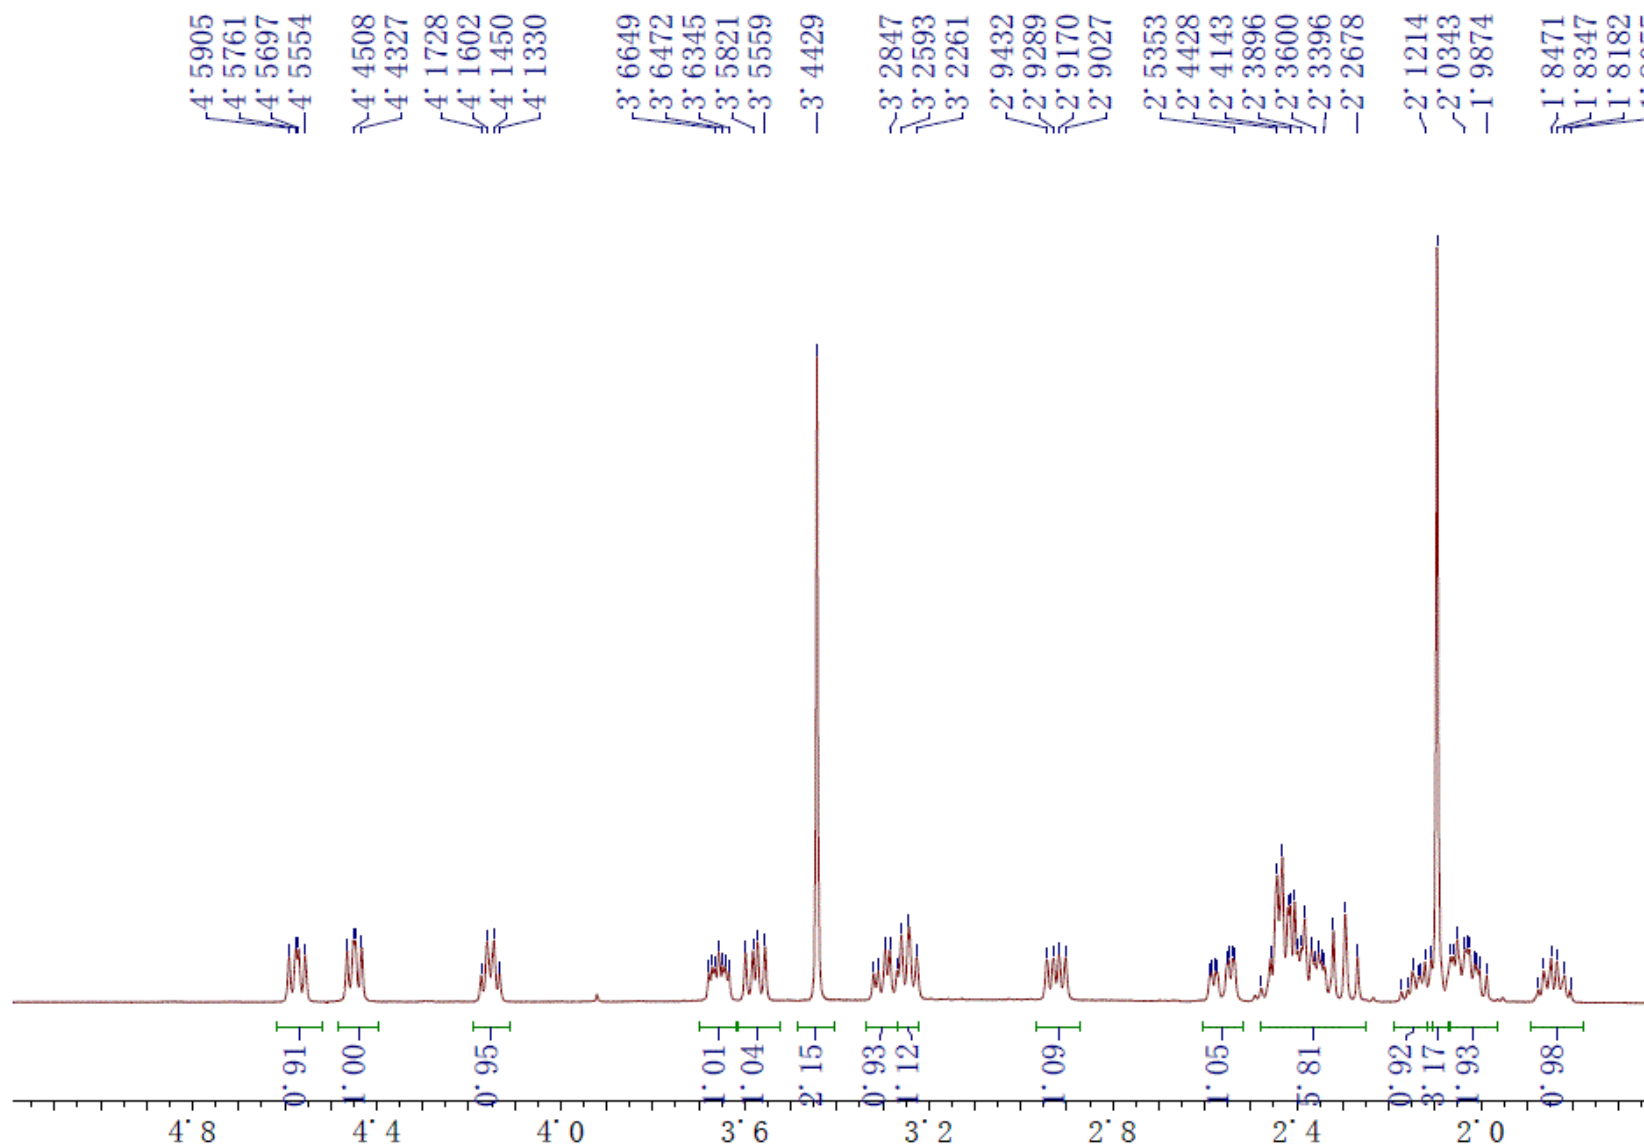

**Figure S1.**  $^1\text{H}$  NMR (500 MHz,  $\text{CDCl}_3$ ) spectrum of compound **1**.

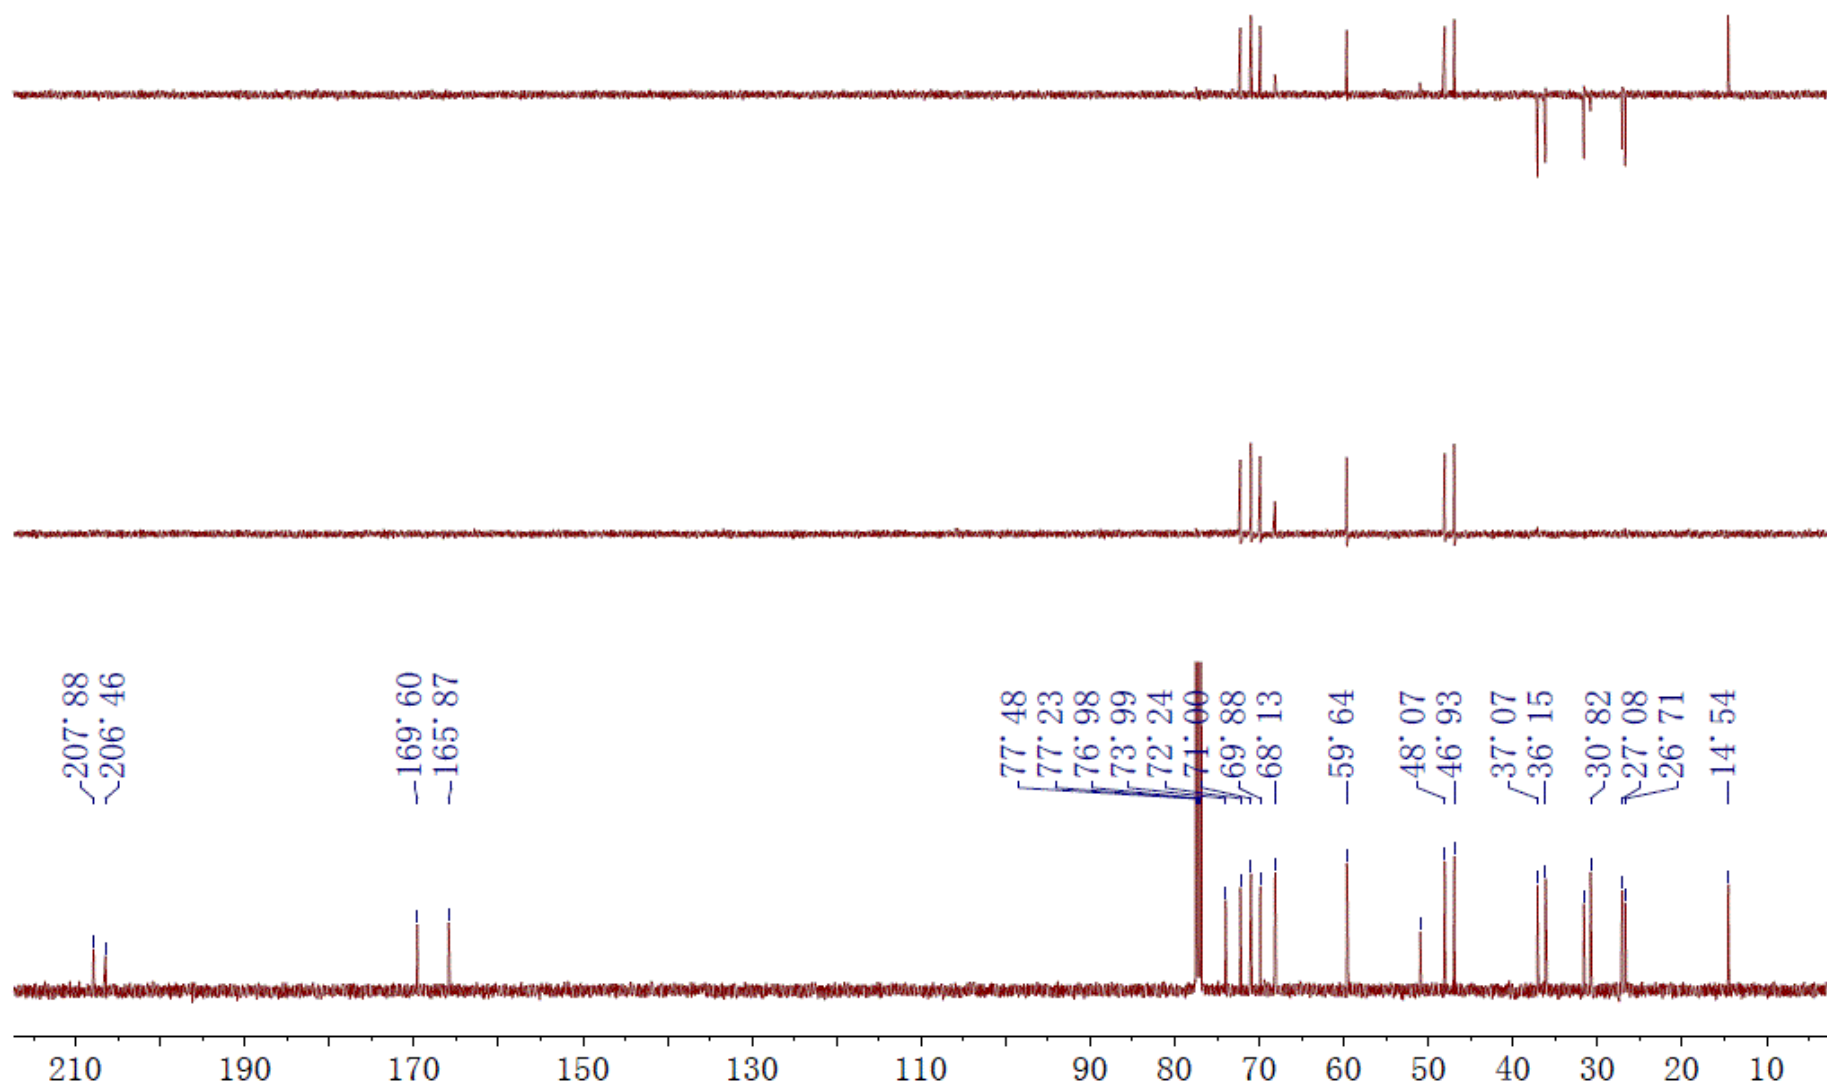

**Figure S2.**  $^{13}\text{C}$  NMR (125 MHz,  $\text{CDCl}_3$ ) and DEPT spectra of compound **1**.

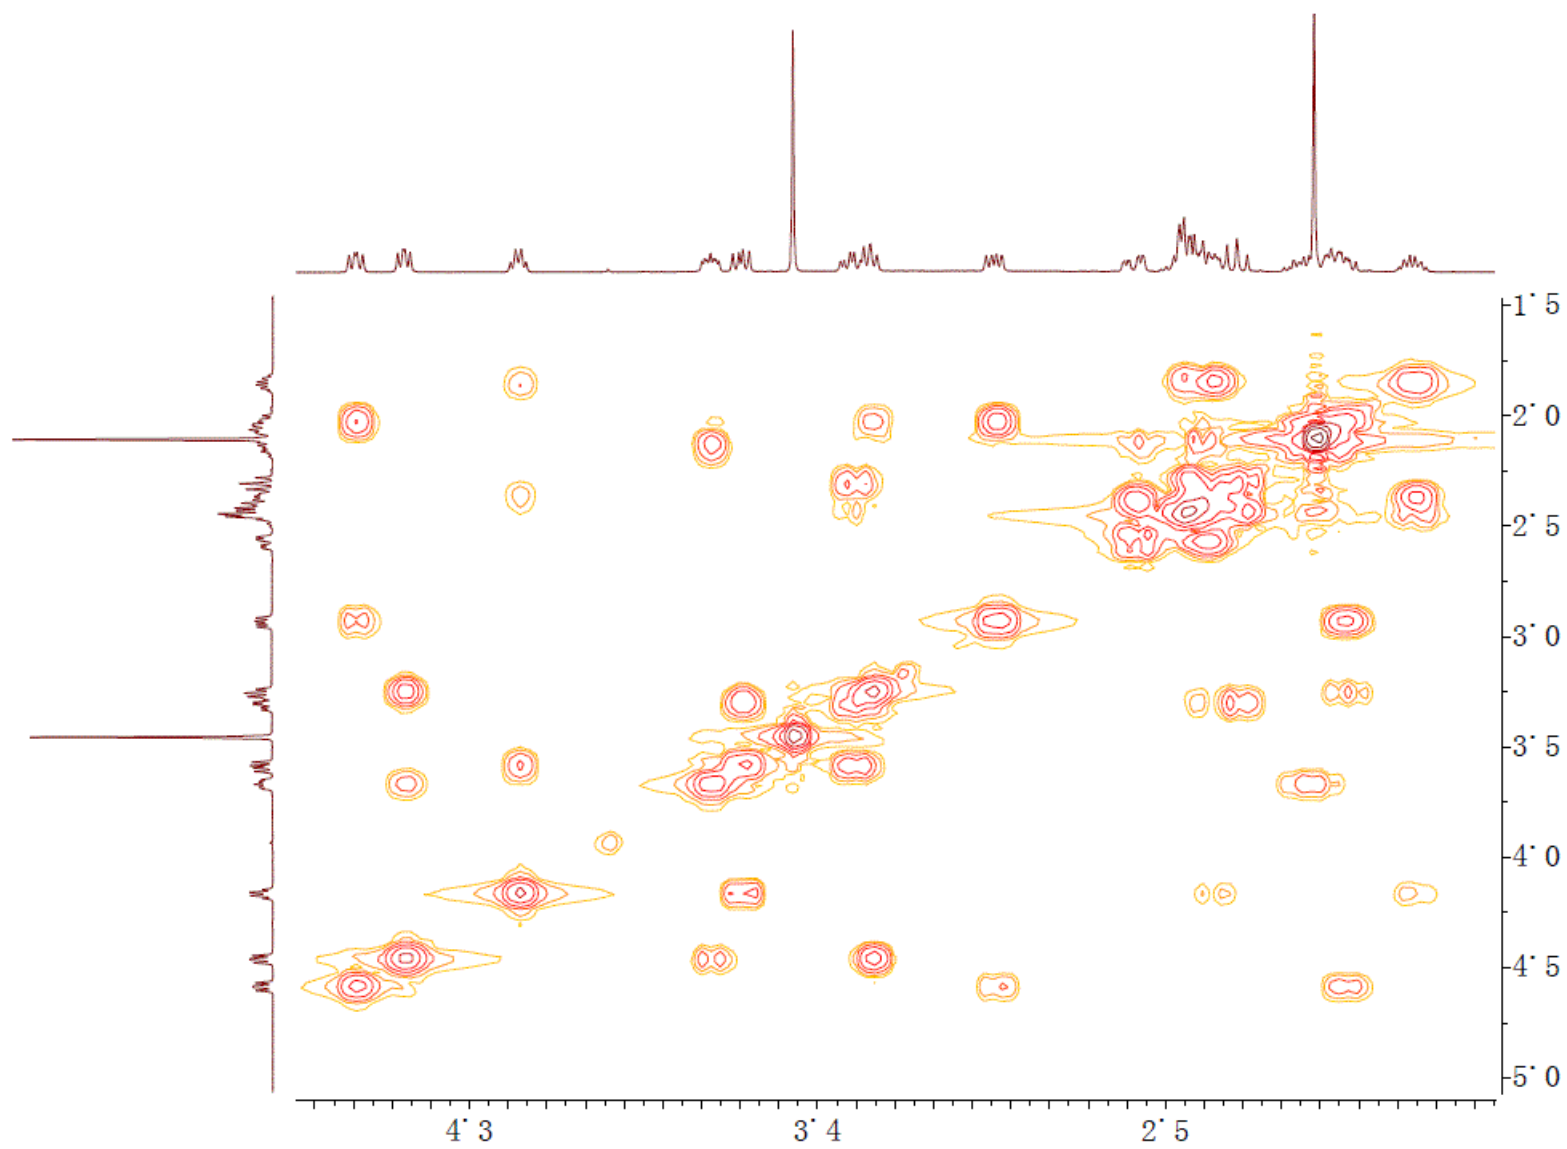

**Figure S3.** COSY spectrum of compound 1.

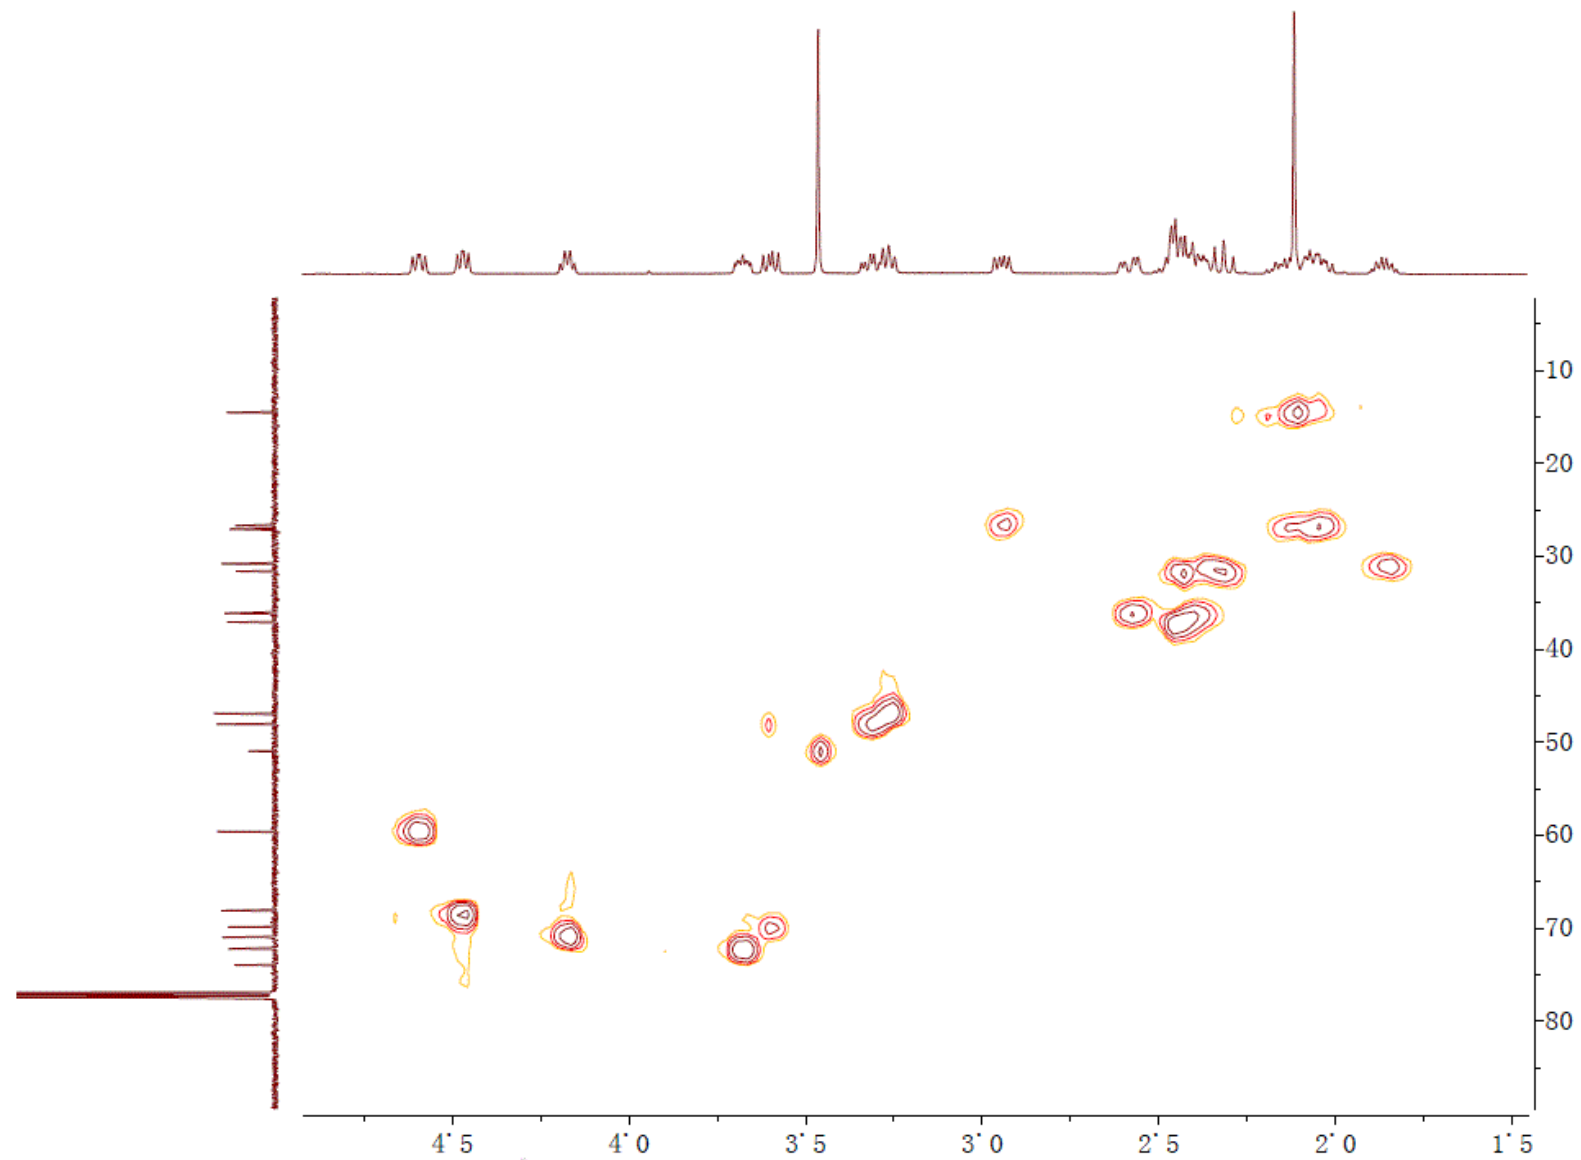

Figure S4. HSQC spectrum of compound 1.

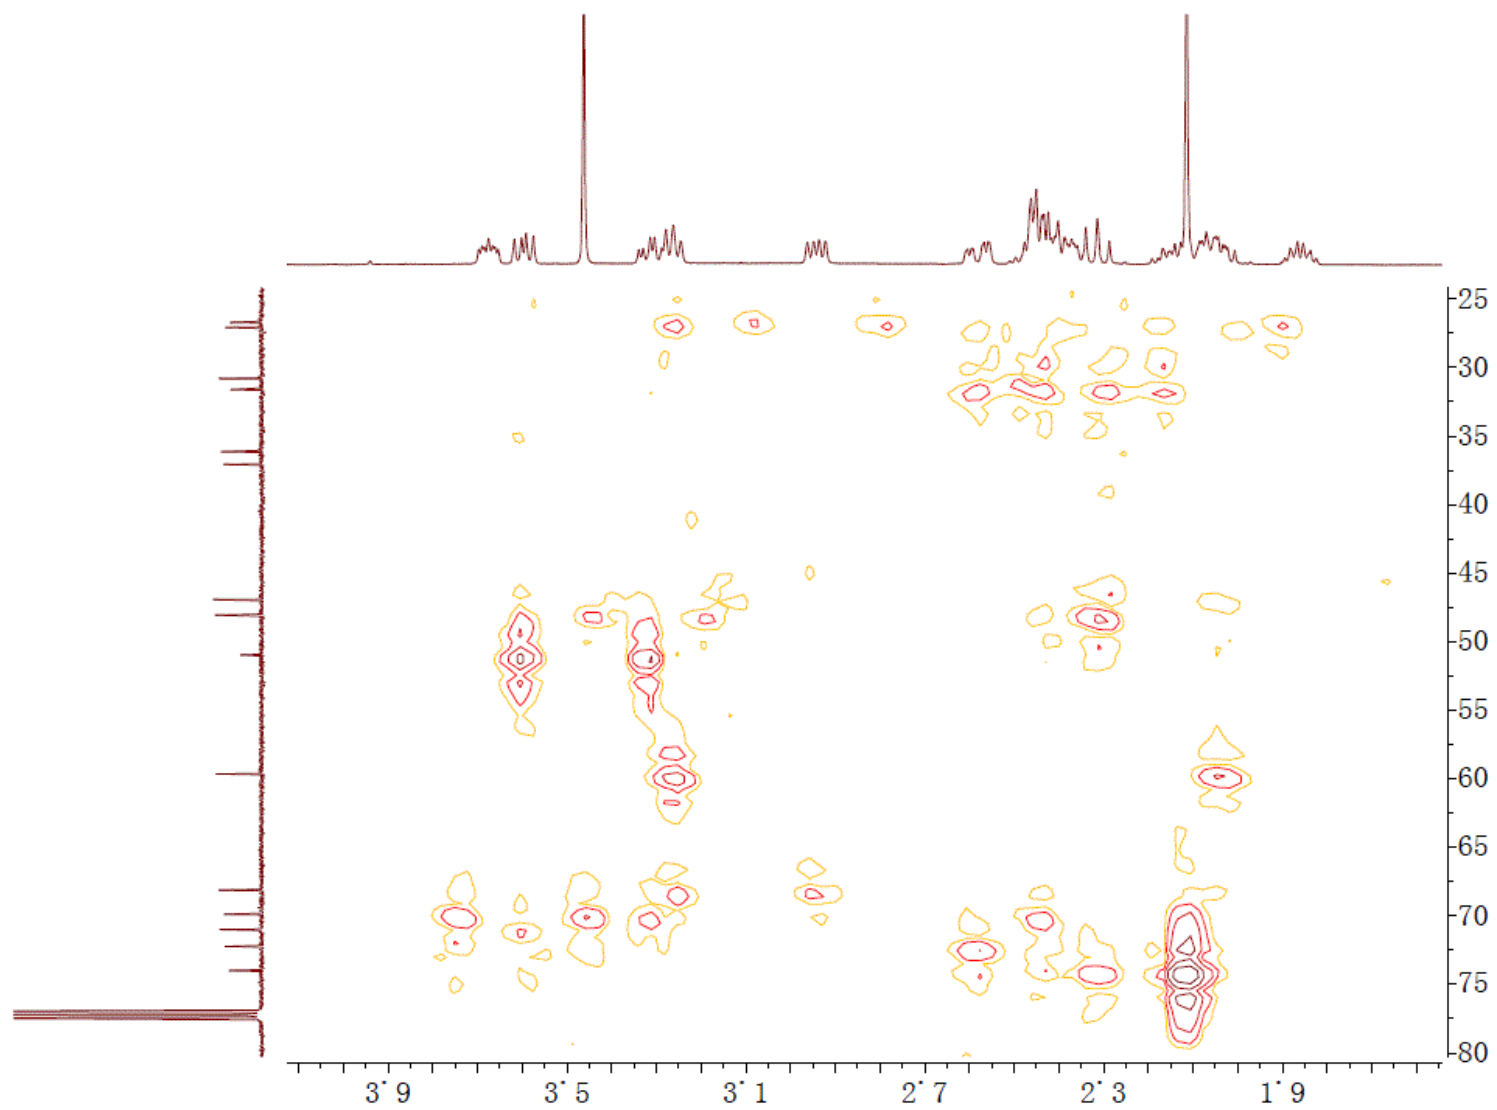

Figure S5. HMBC spectrum of compound 1.

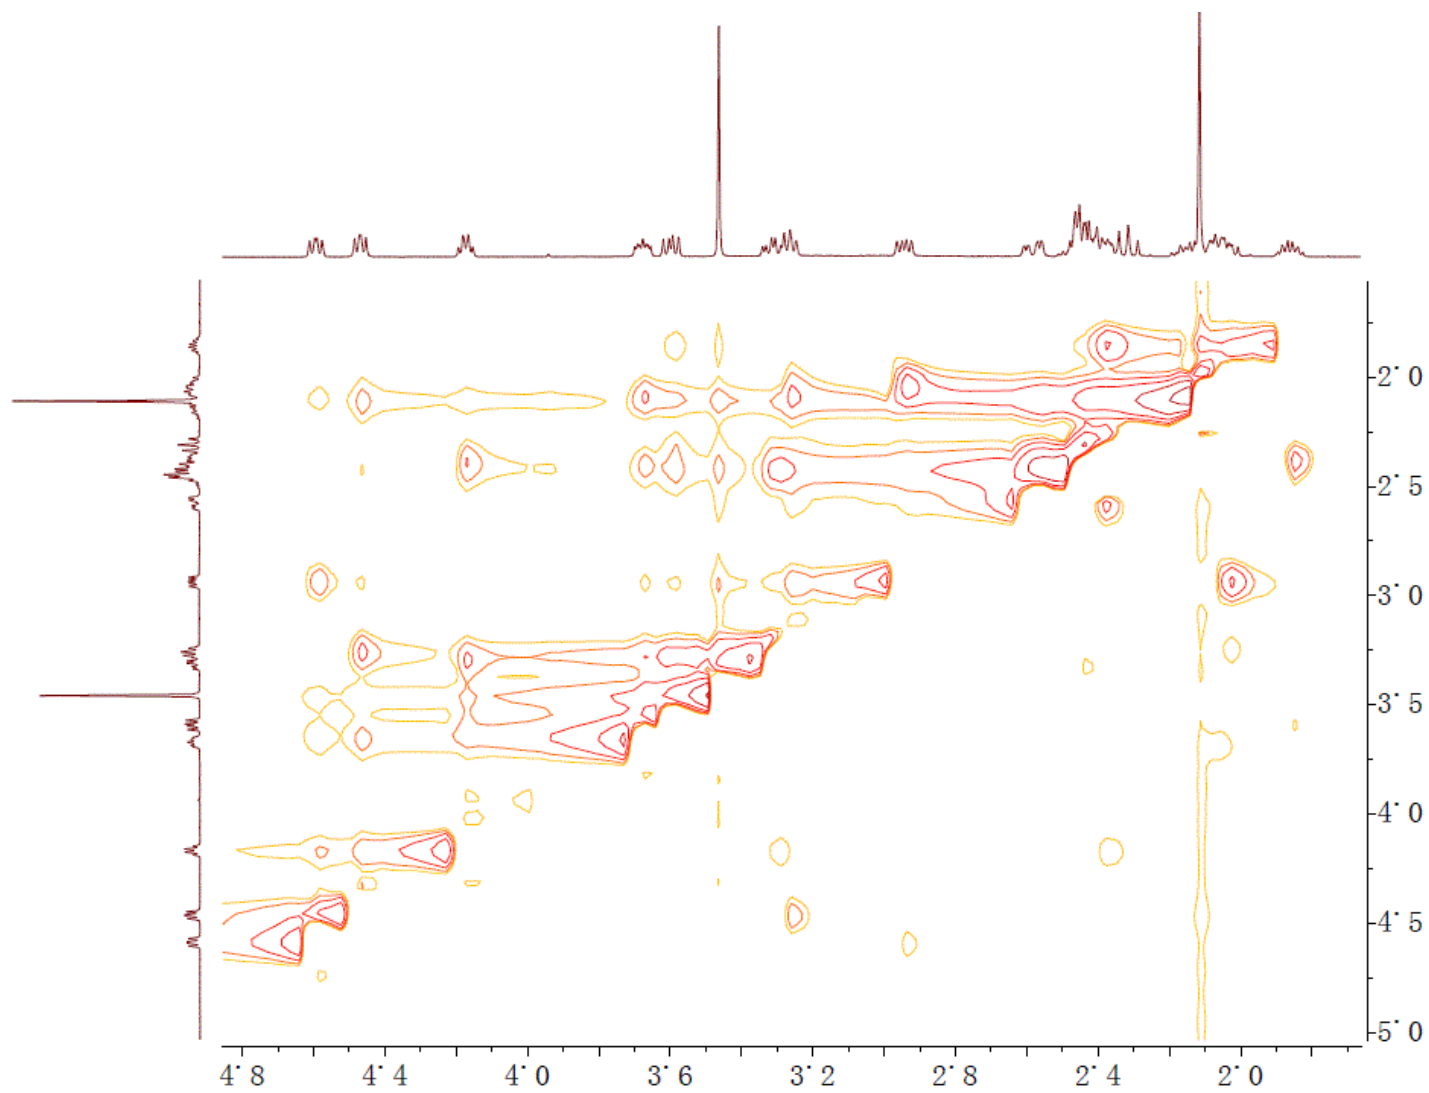

**Figure S6.** NOESY spectrum of compound **1**.

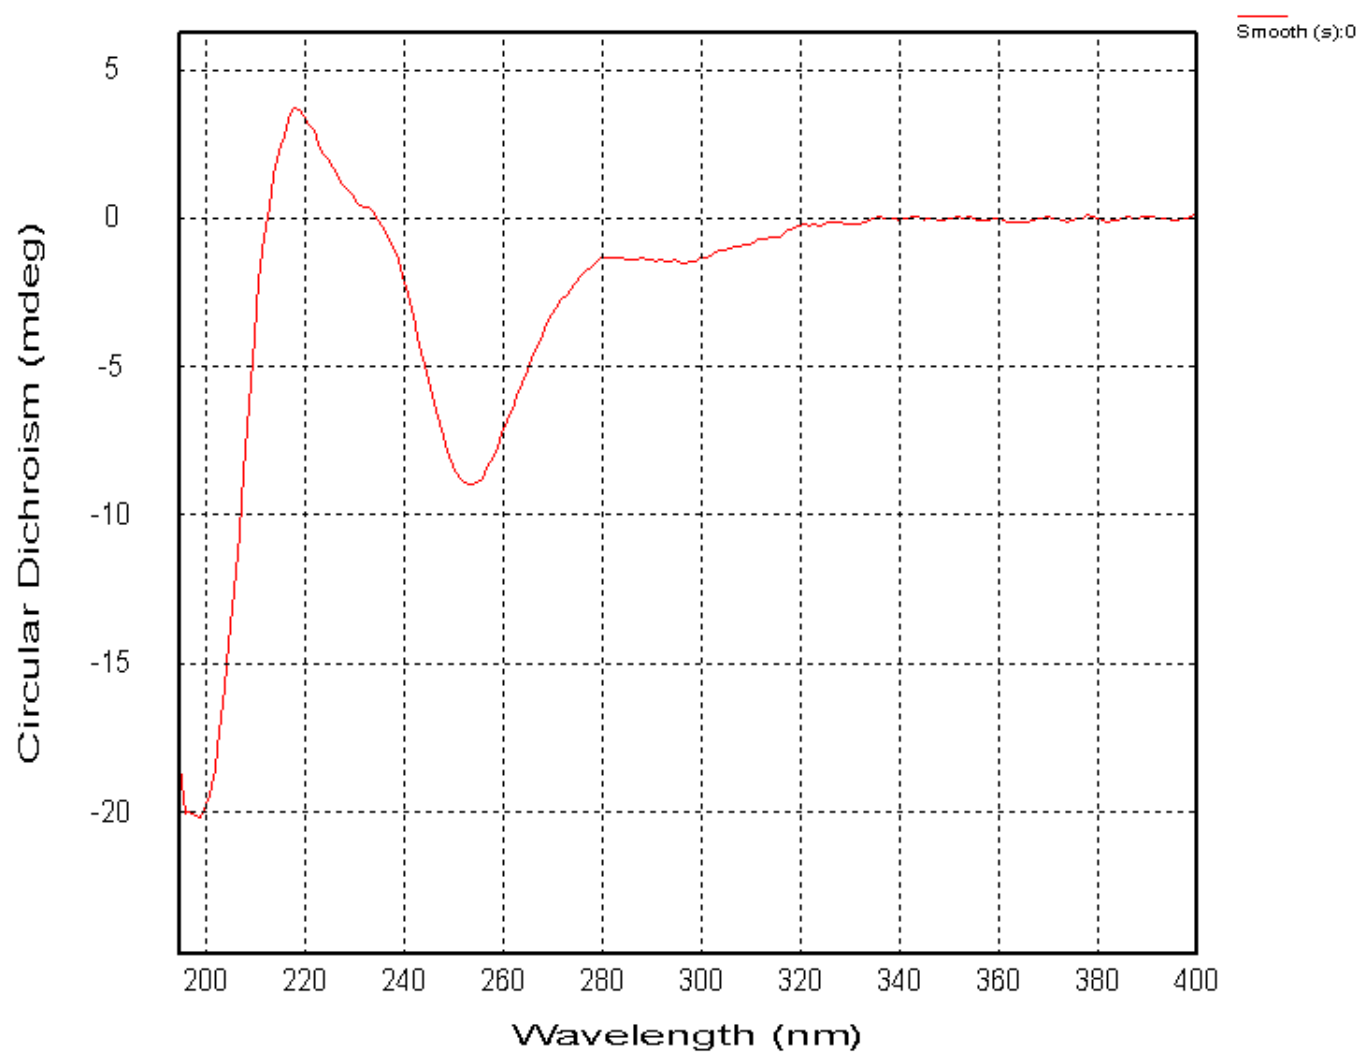

**Figure S7.** CD spectrum of compound **1**.

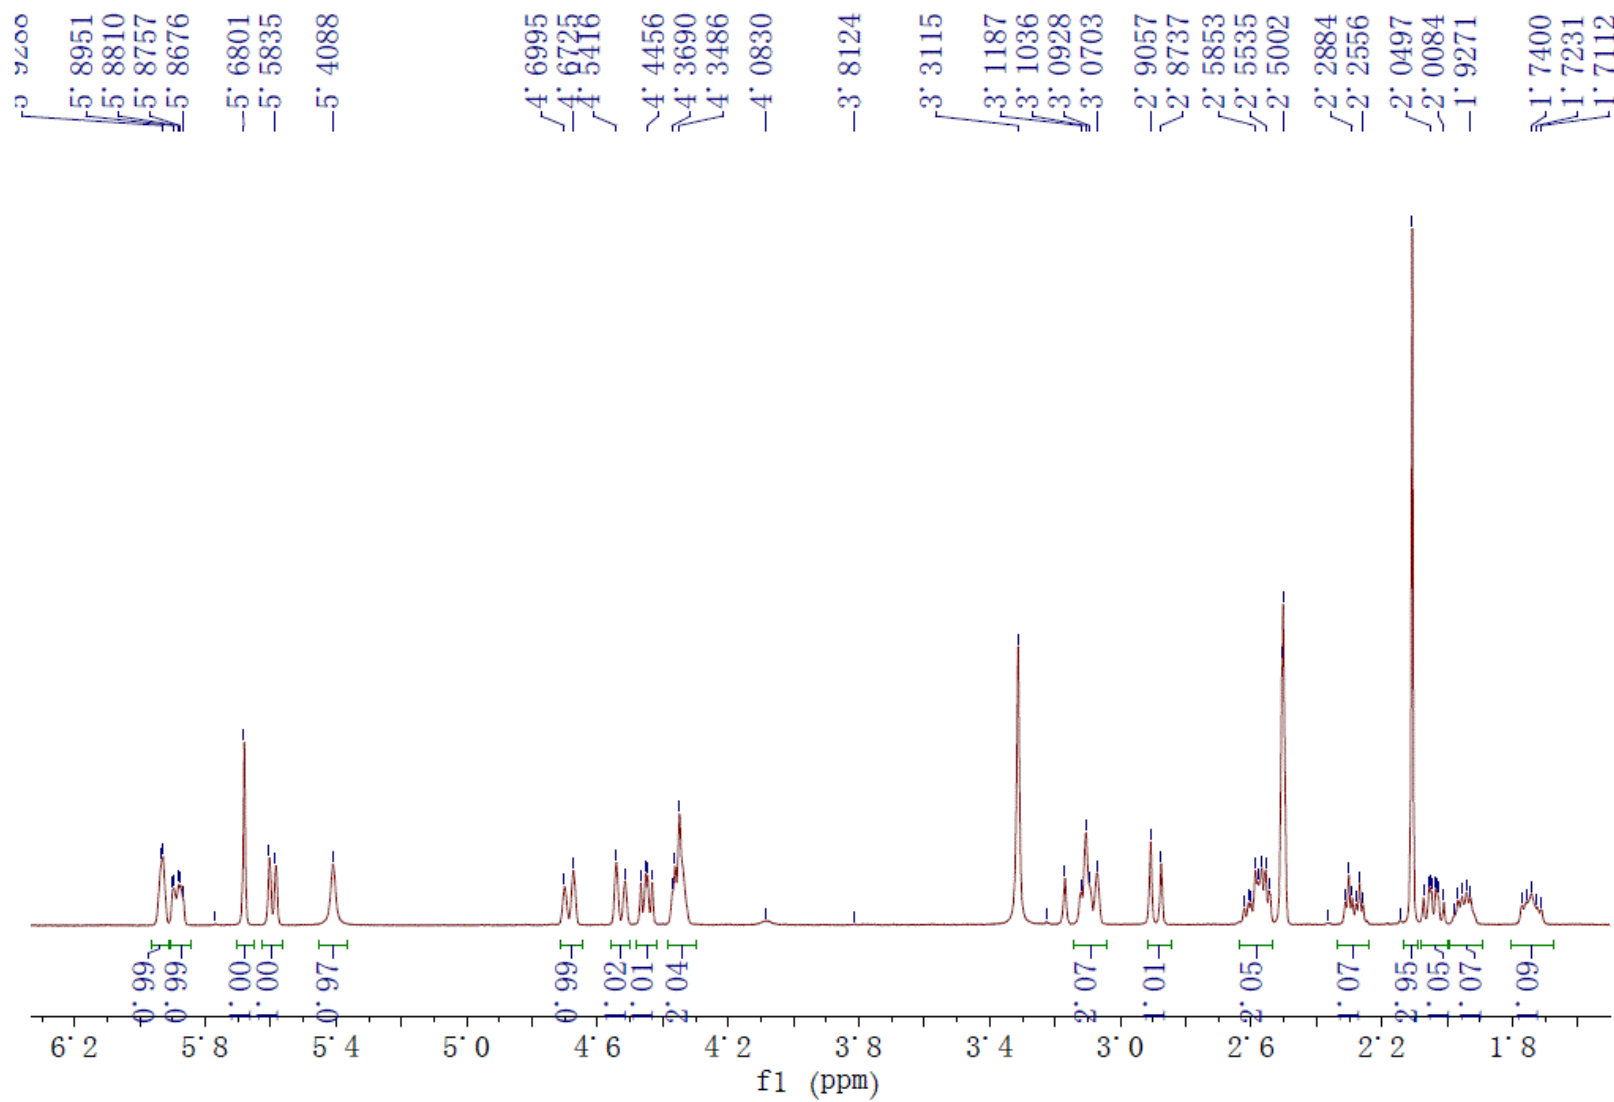

Figure S8. <sup>1</sup>H NMR (500 MHz, DMSO-*d*<sub>6</sub>) spectrum of compound 2.



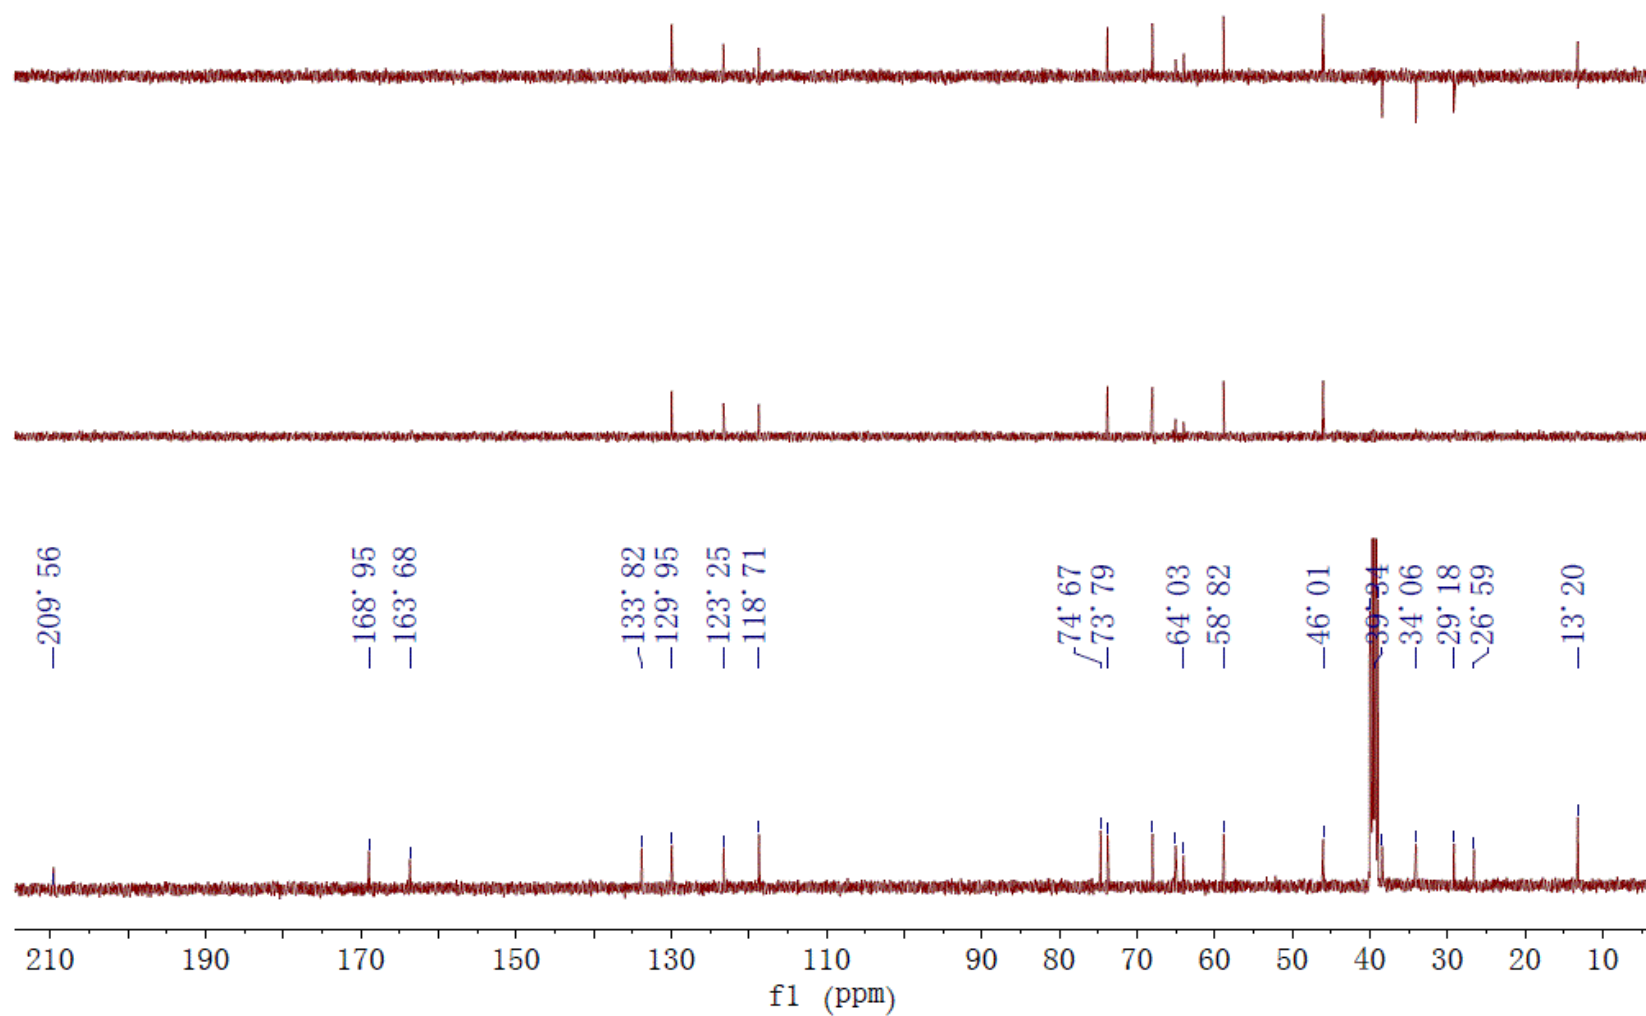

**Figure S9.**  $^{13}\text{C}$  NMR (125 MHz,  $\text{DMSO-}d_6$ ) and DEPT spectra of compound 2.

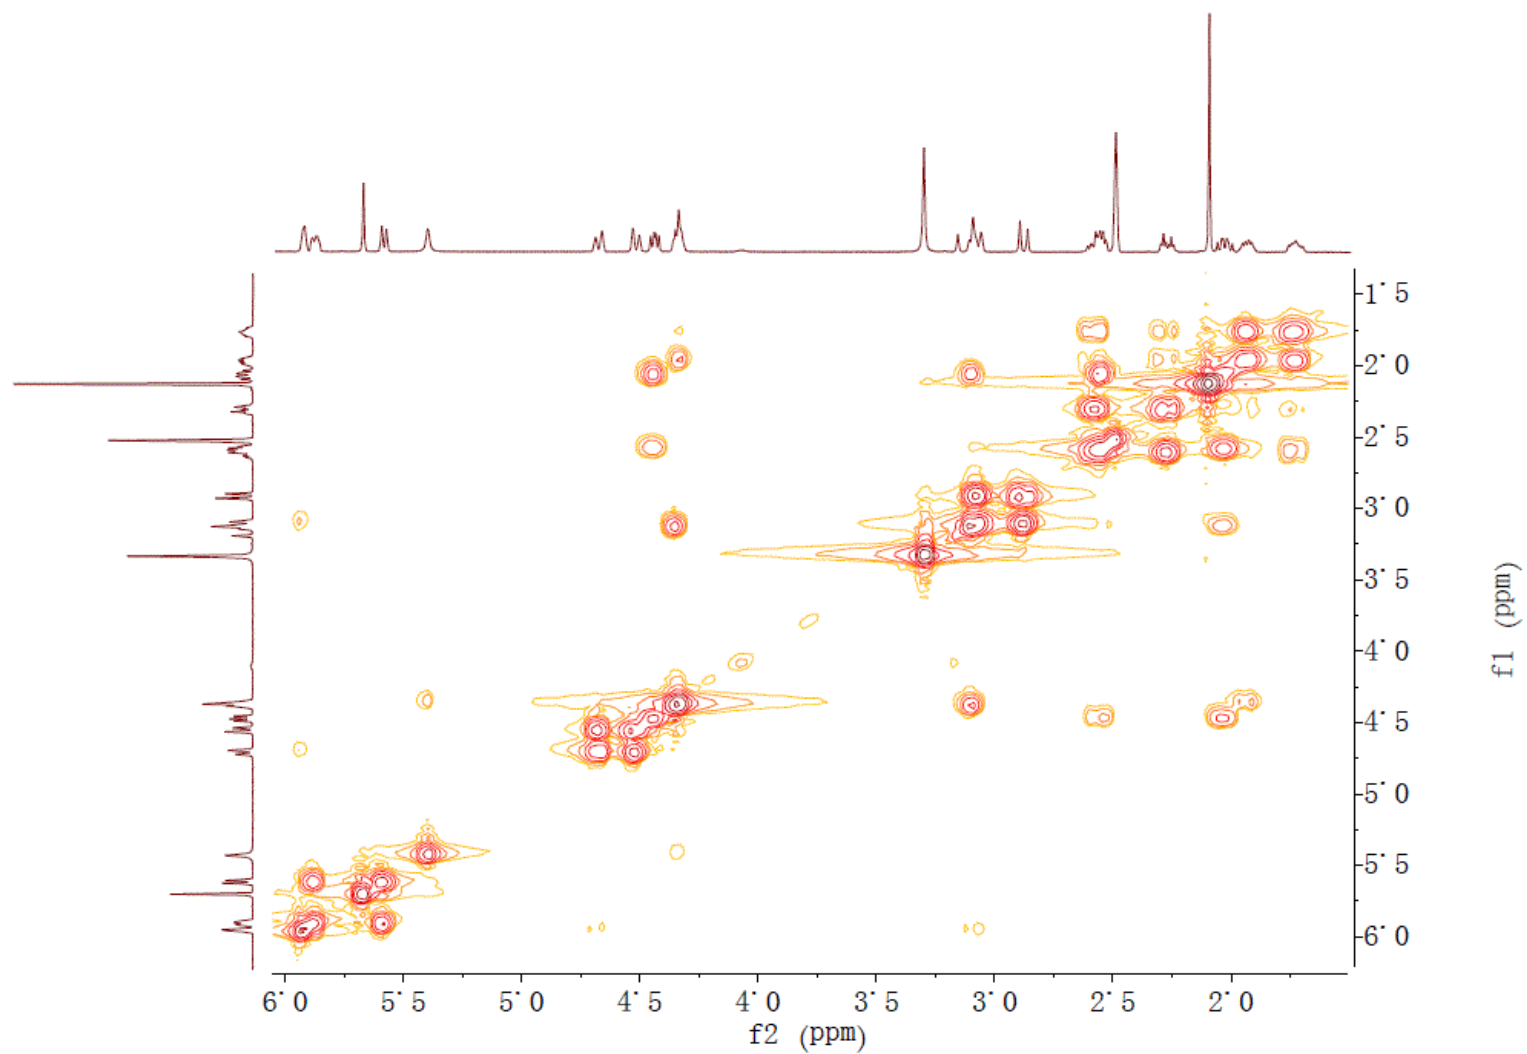

Figure S10. COSY spectrum of compound 2.

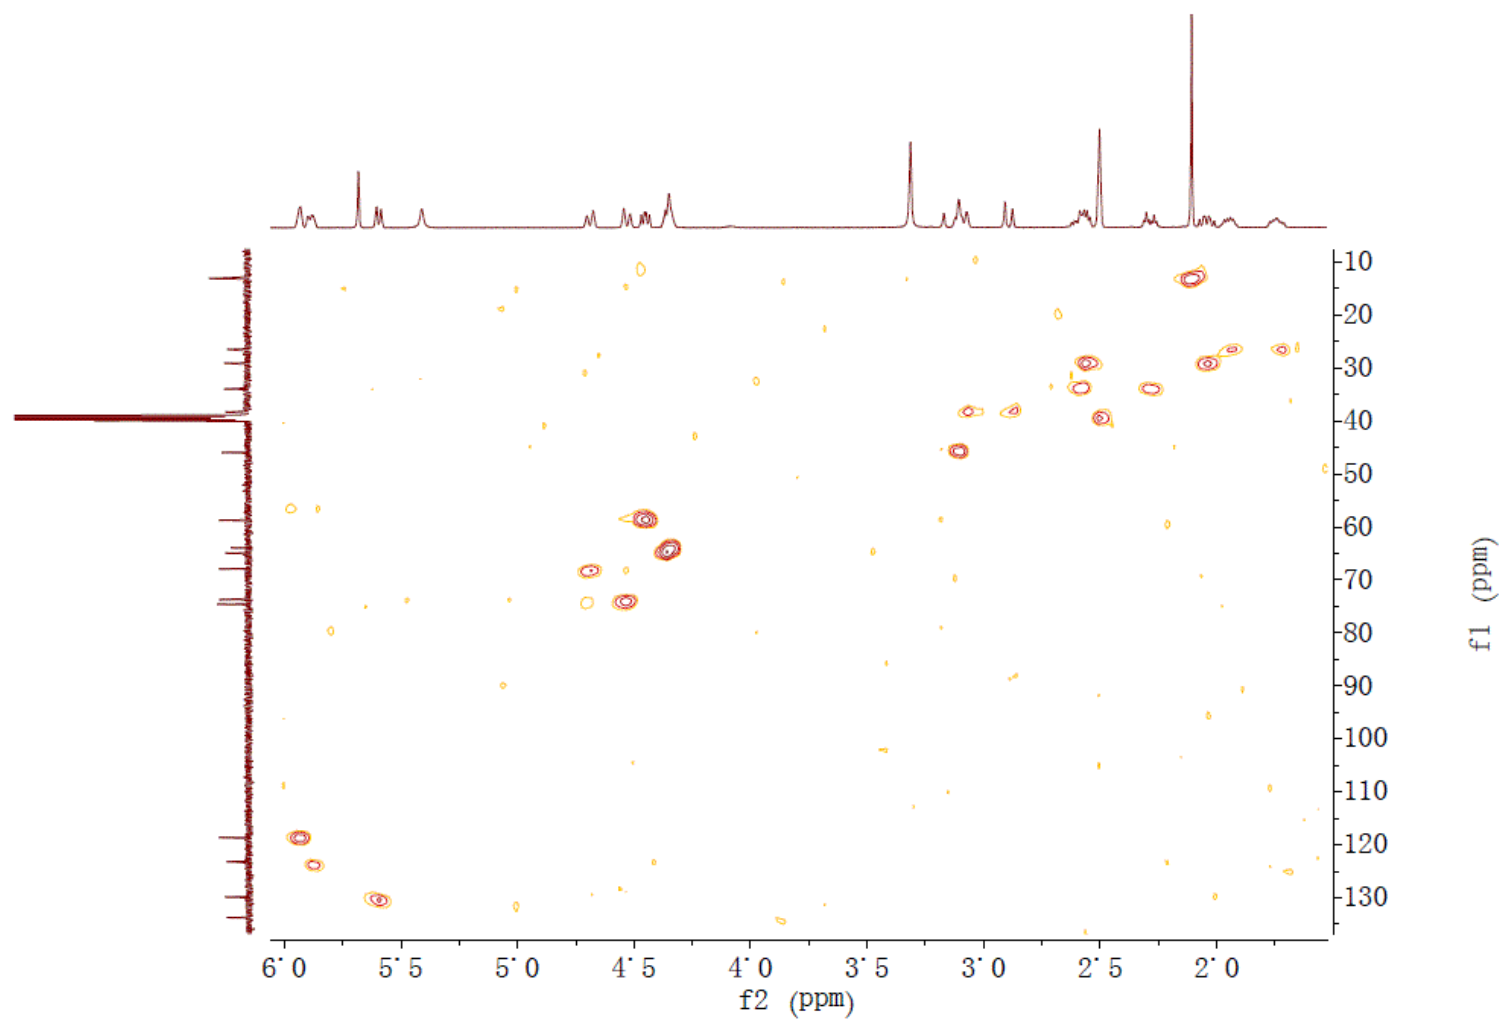

Figure S11. HSQC spectrum of compound 2.

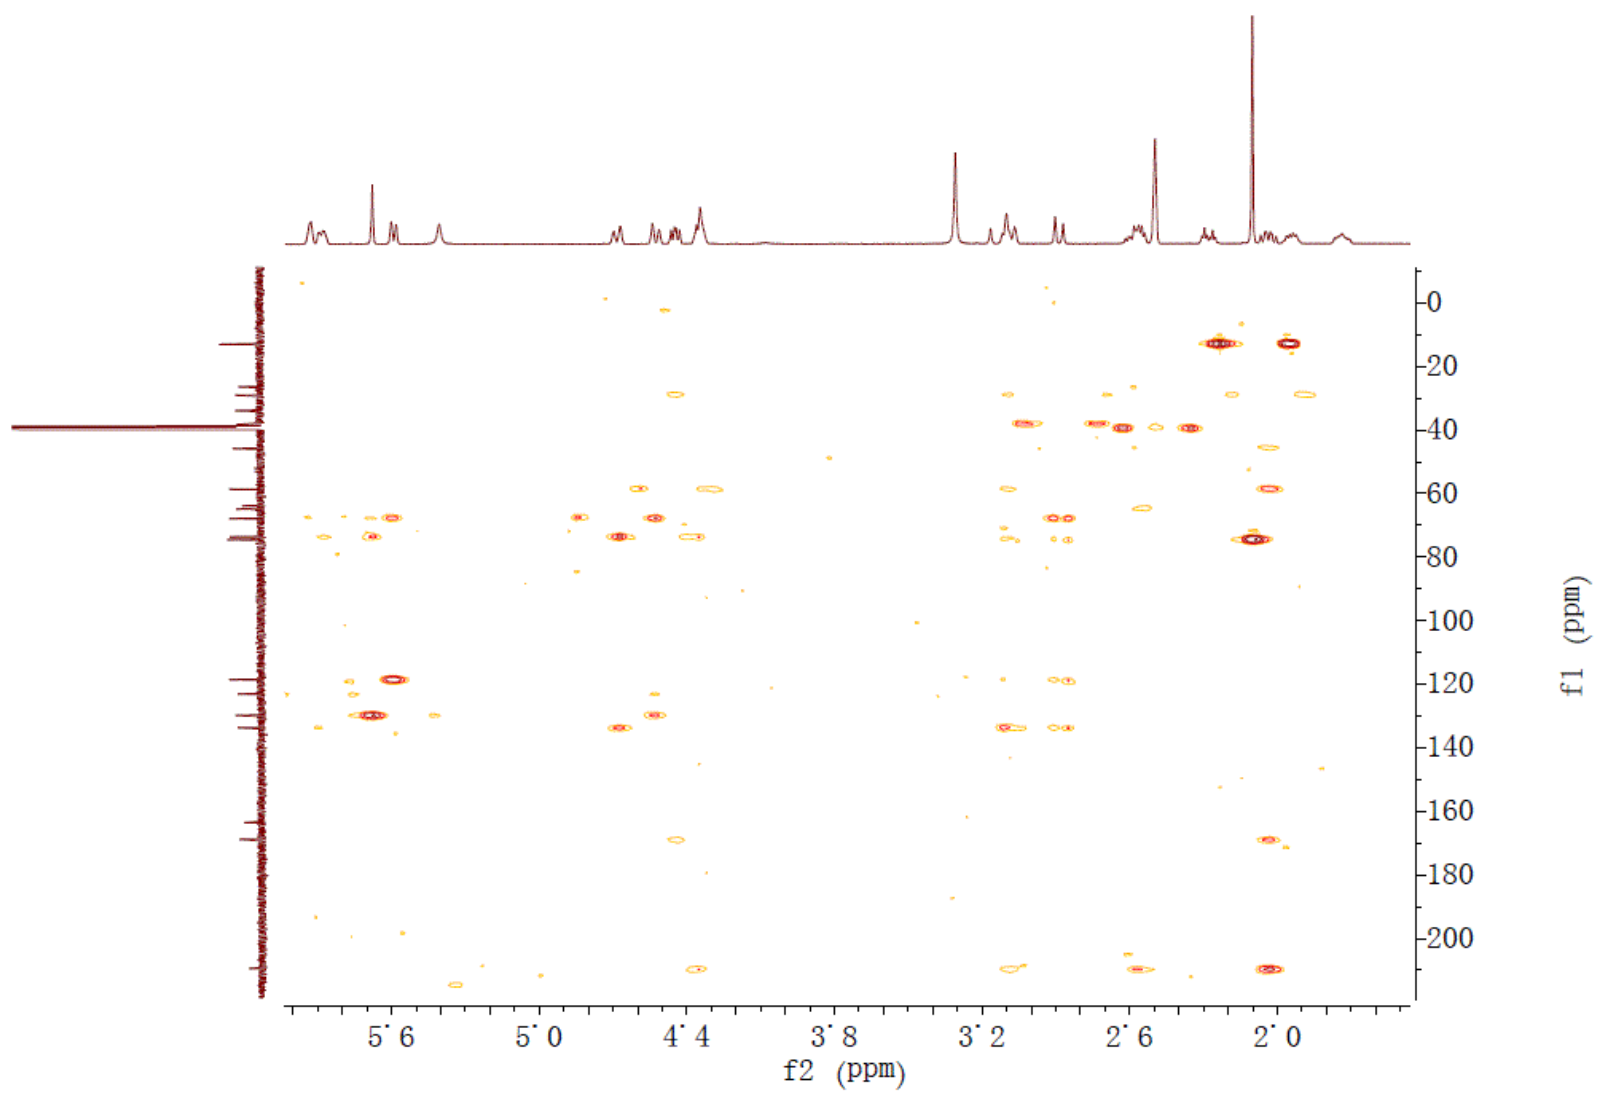

**Figure S12.** HMBC spectrum of compound 2.

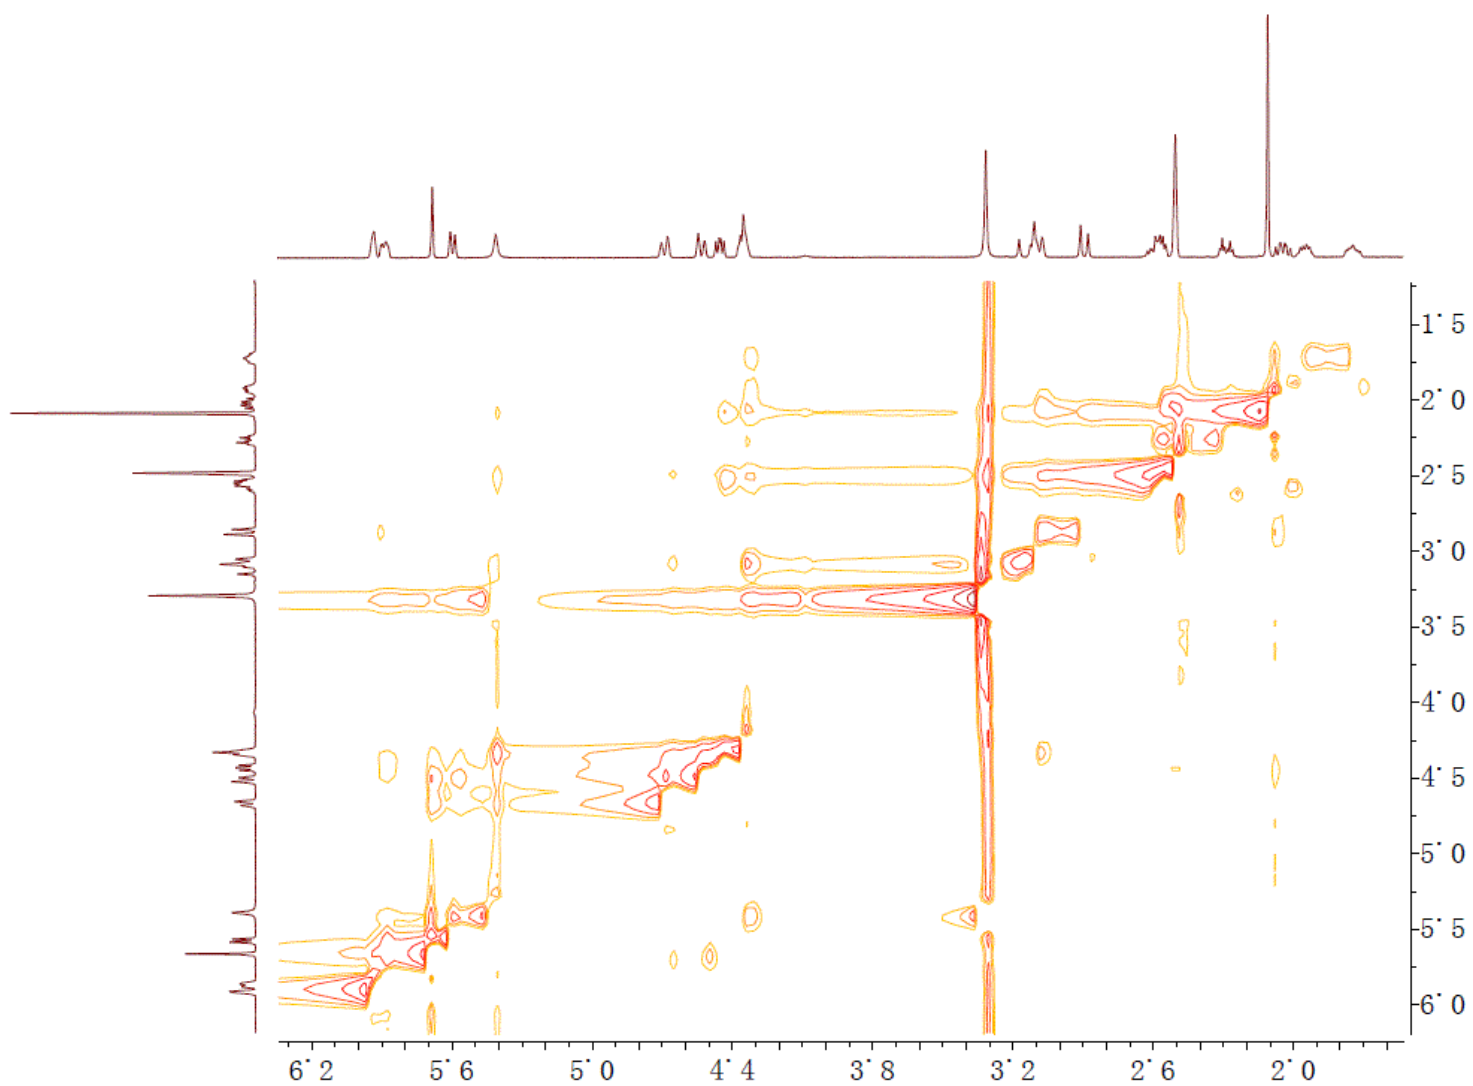

**Figure S13.** NOESY spectrum of compound 2.

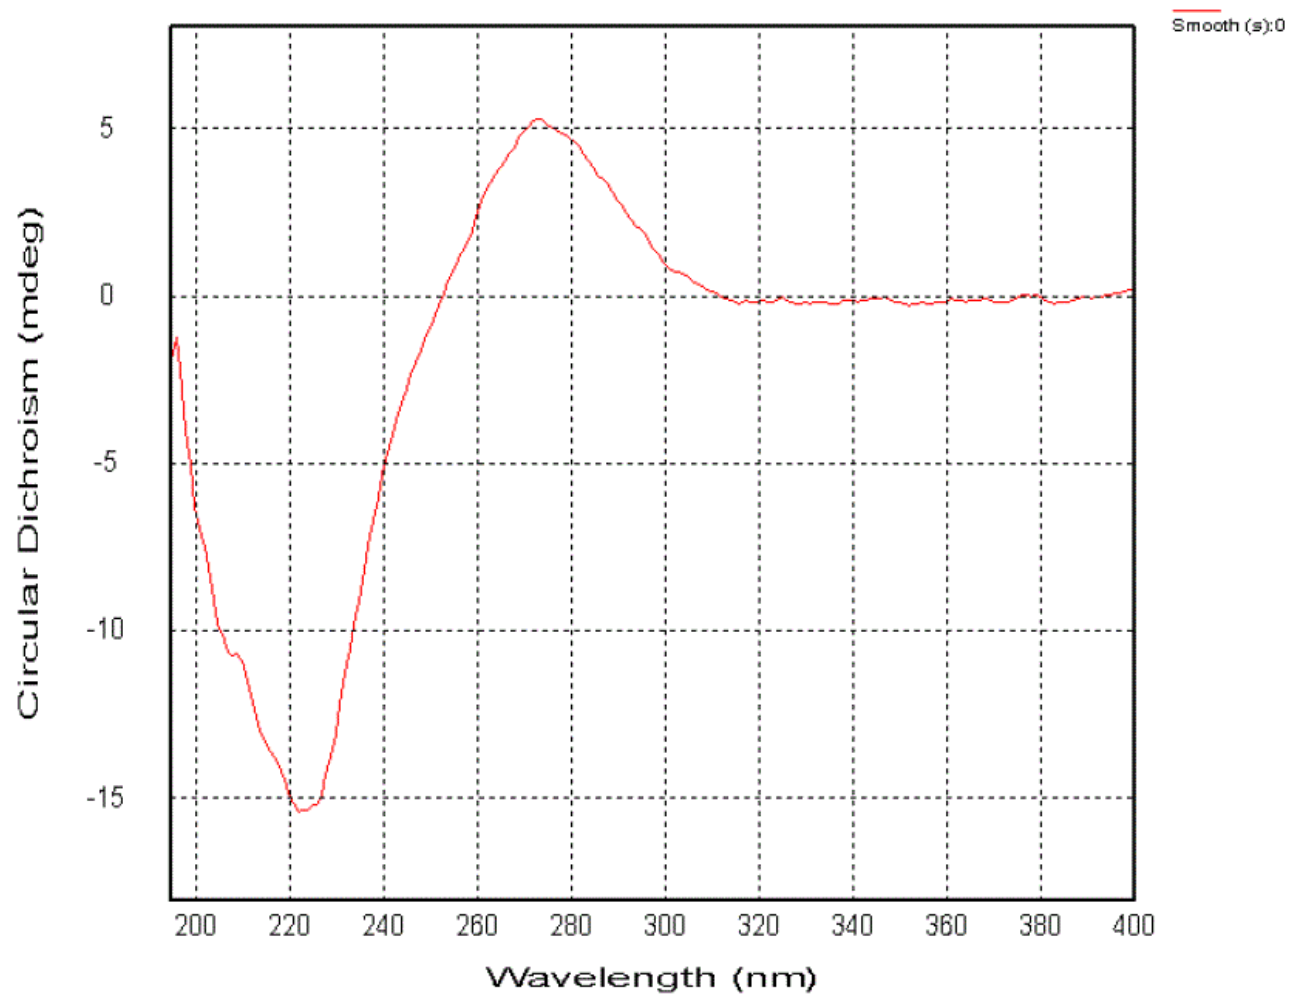

Figure S14. CD spectrum of compound 2.

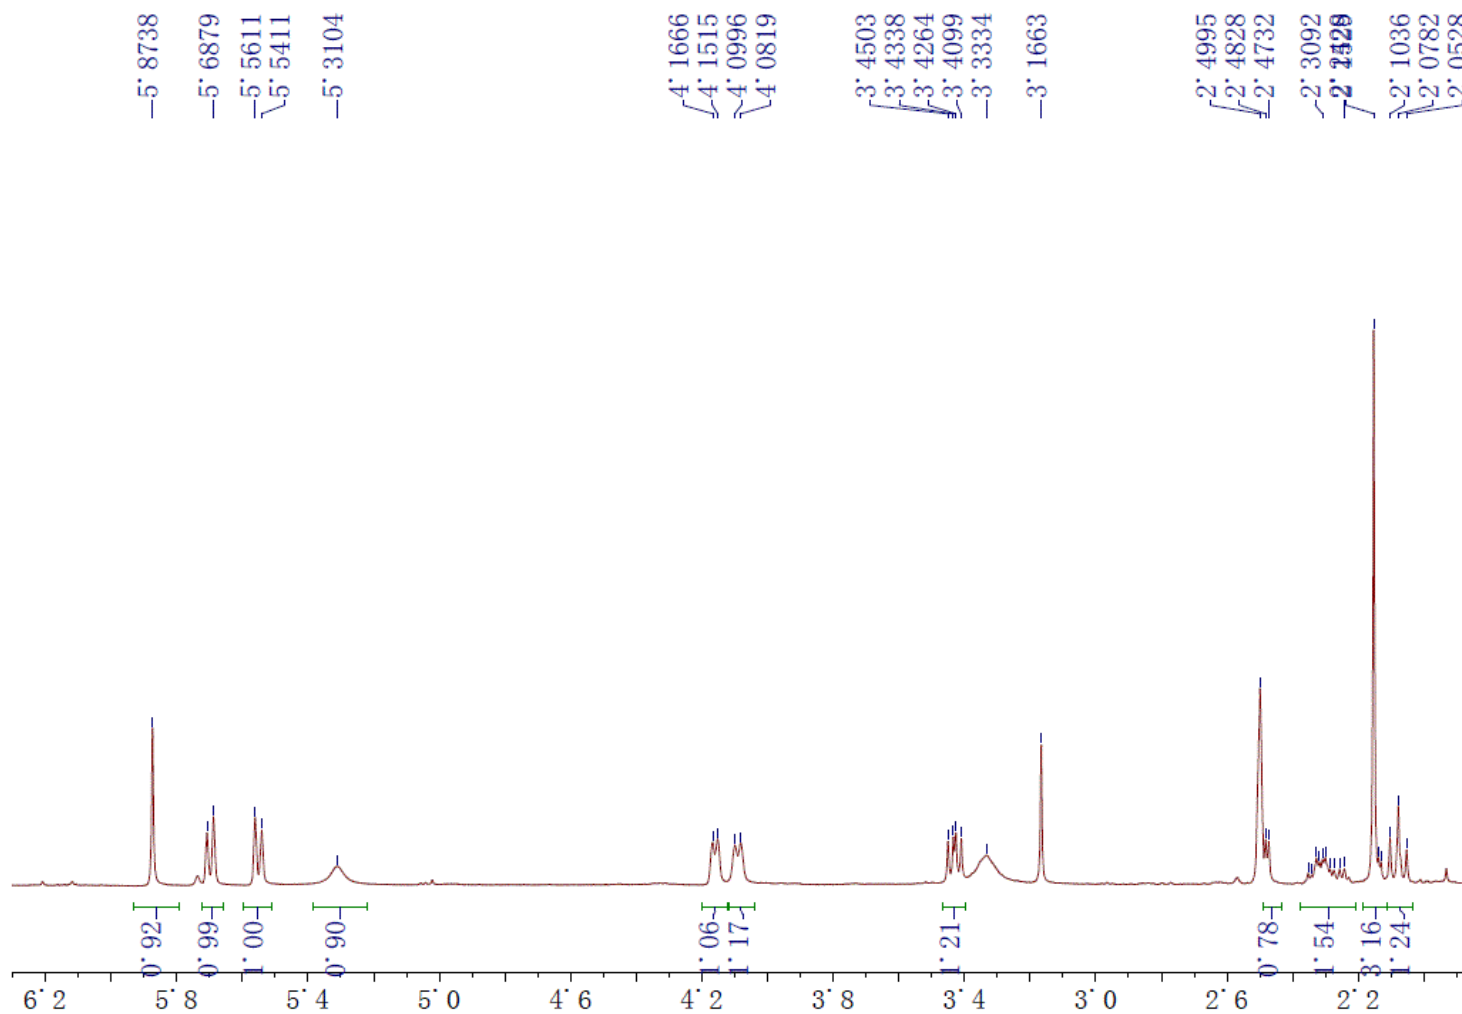

**Figure S15.** <sup>1</sup>H NMR (500 MHz, DMSO-*d*<sub>6</sub>) spectrum of compound 3.

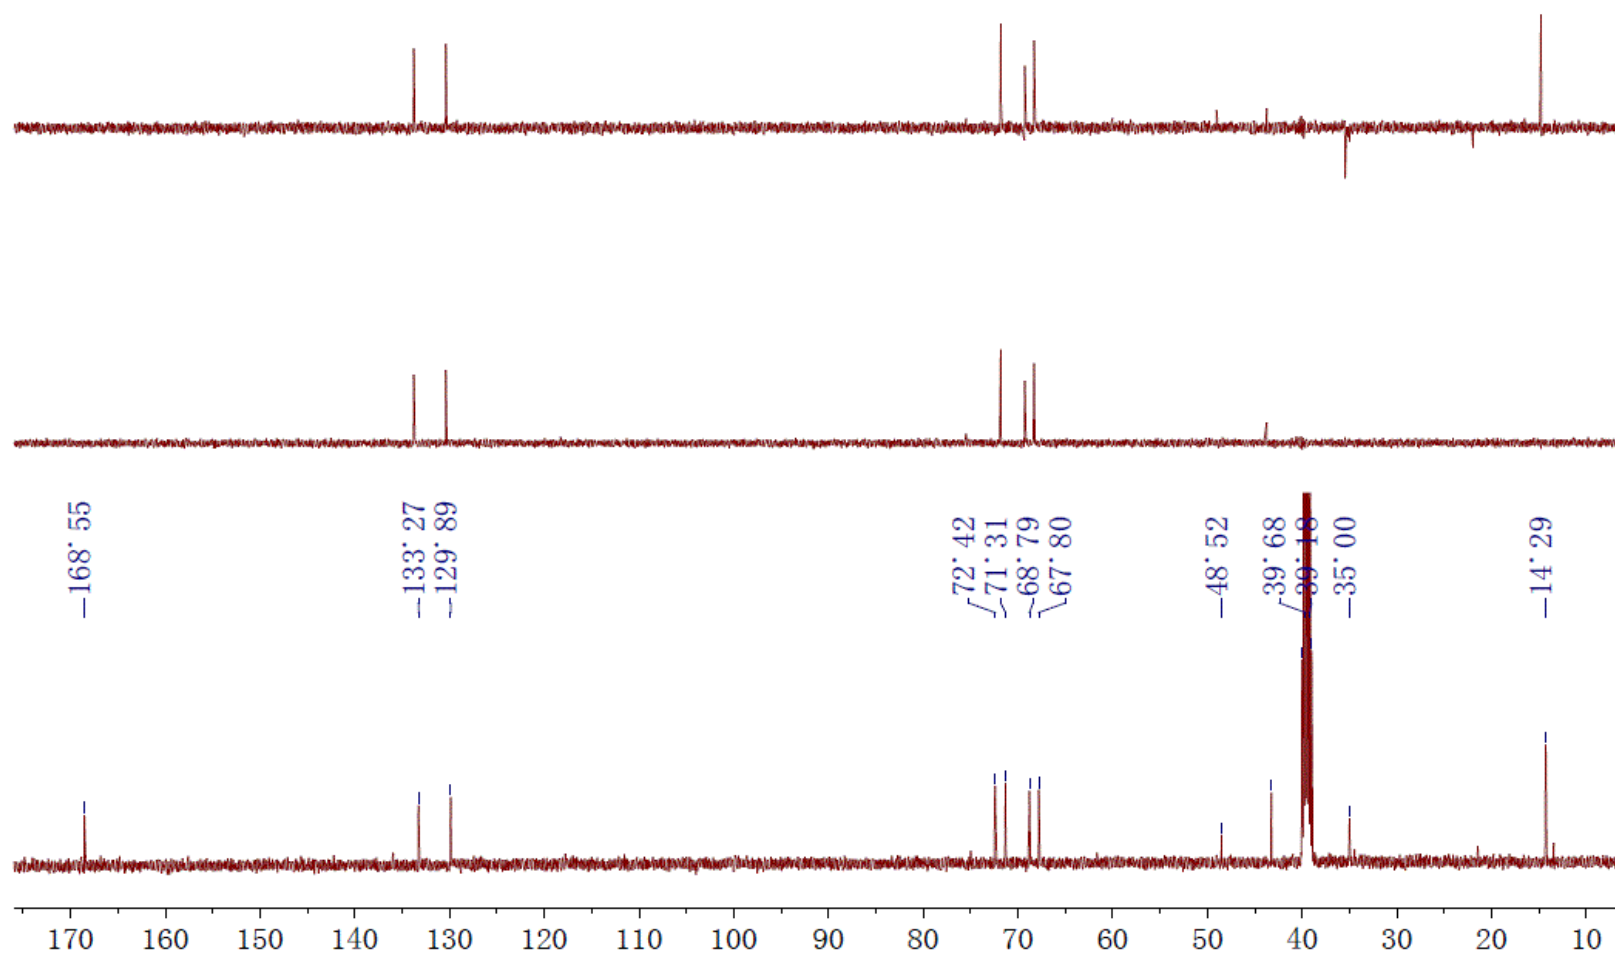

**Figure S16.**  $^{13}\text{C}$  NMR (125 MHz,  $\text{DMSO-}d_6$ ) and DEPT spectra of compound **3**.



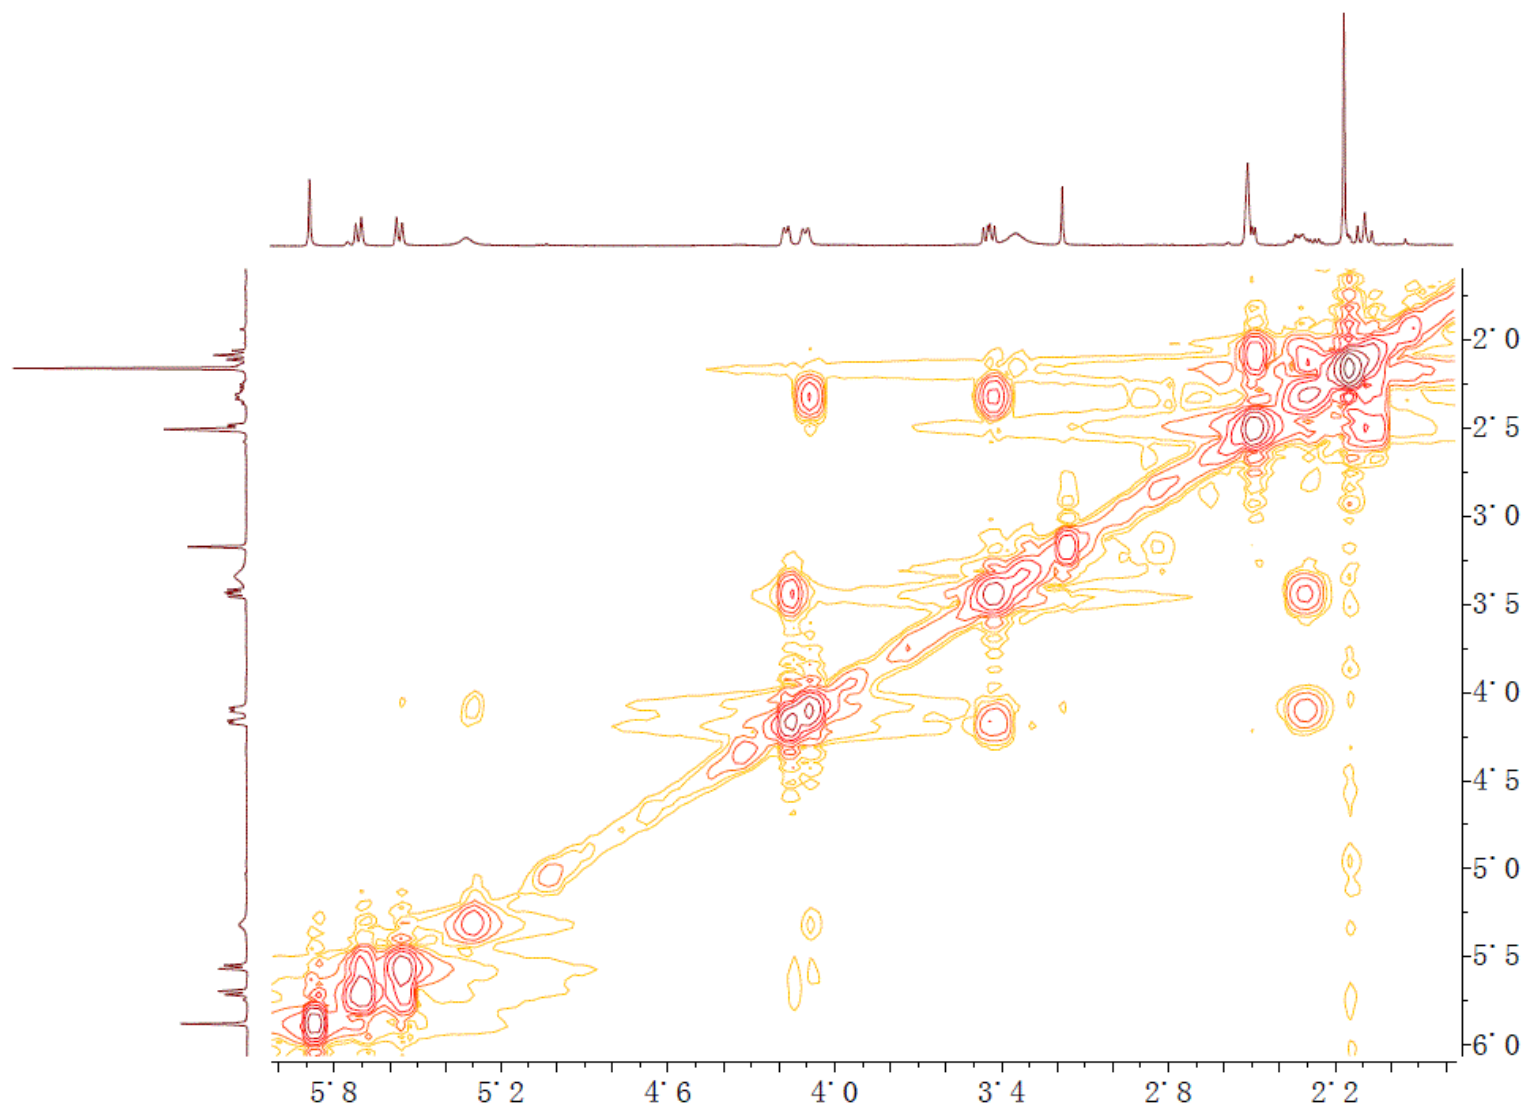

Figure S17.  $^1\text{H}$ - $^1\text{H}$  COSY spectrum of compound 3.

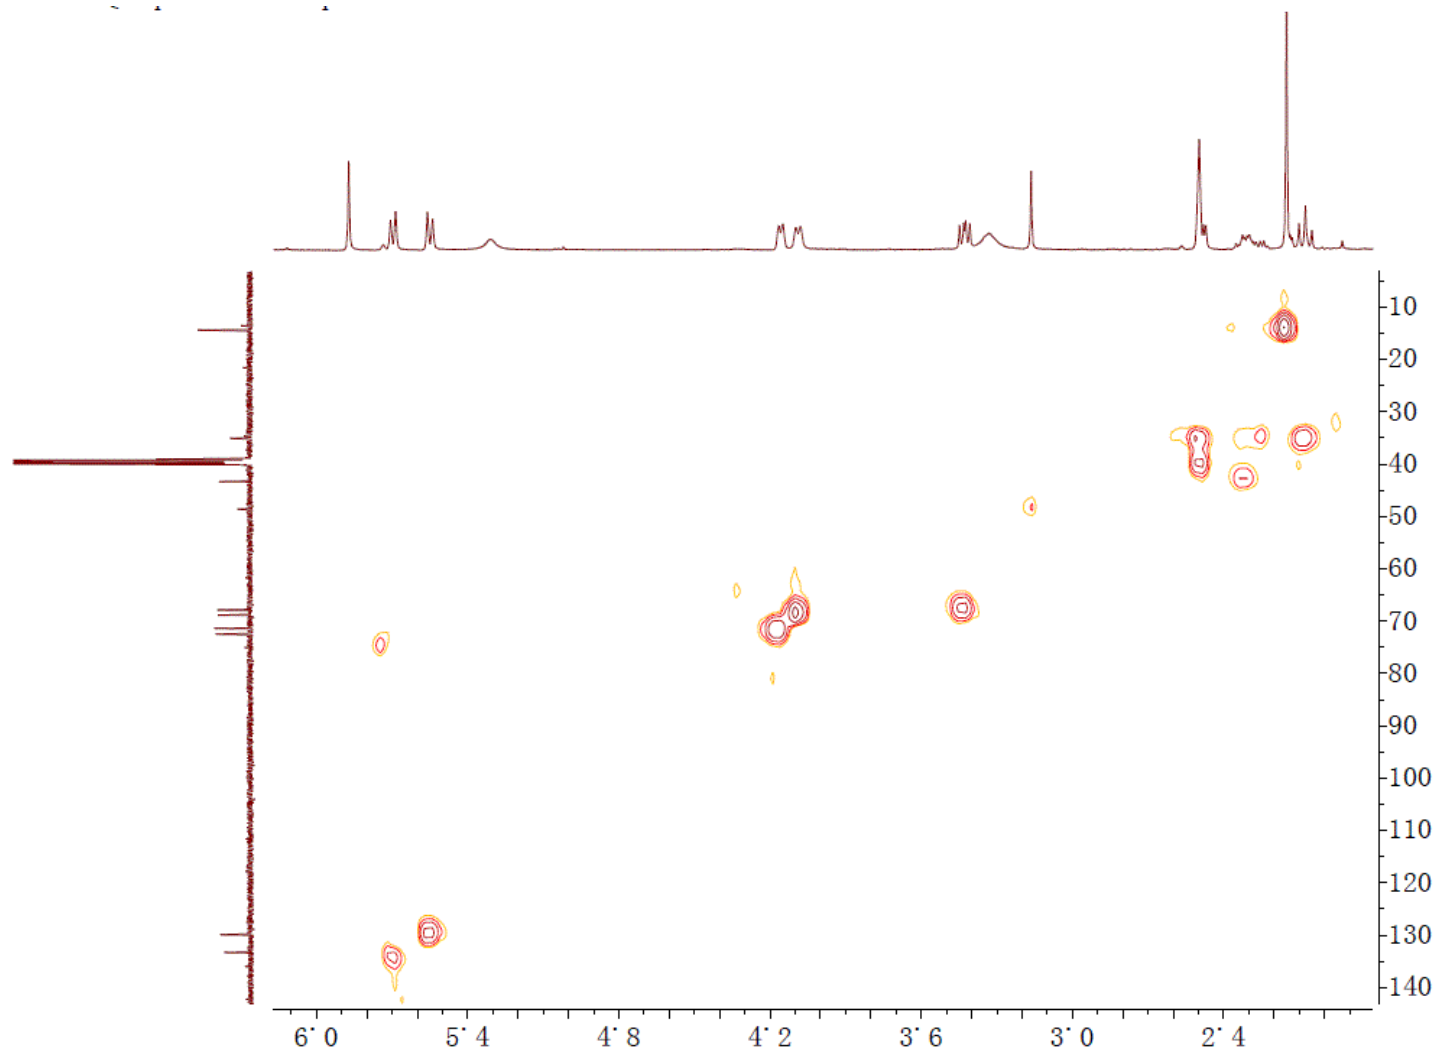

**Figure S18.** HSQC spectrum of compound 3.

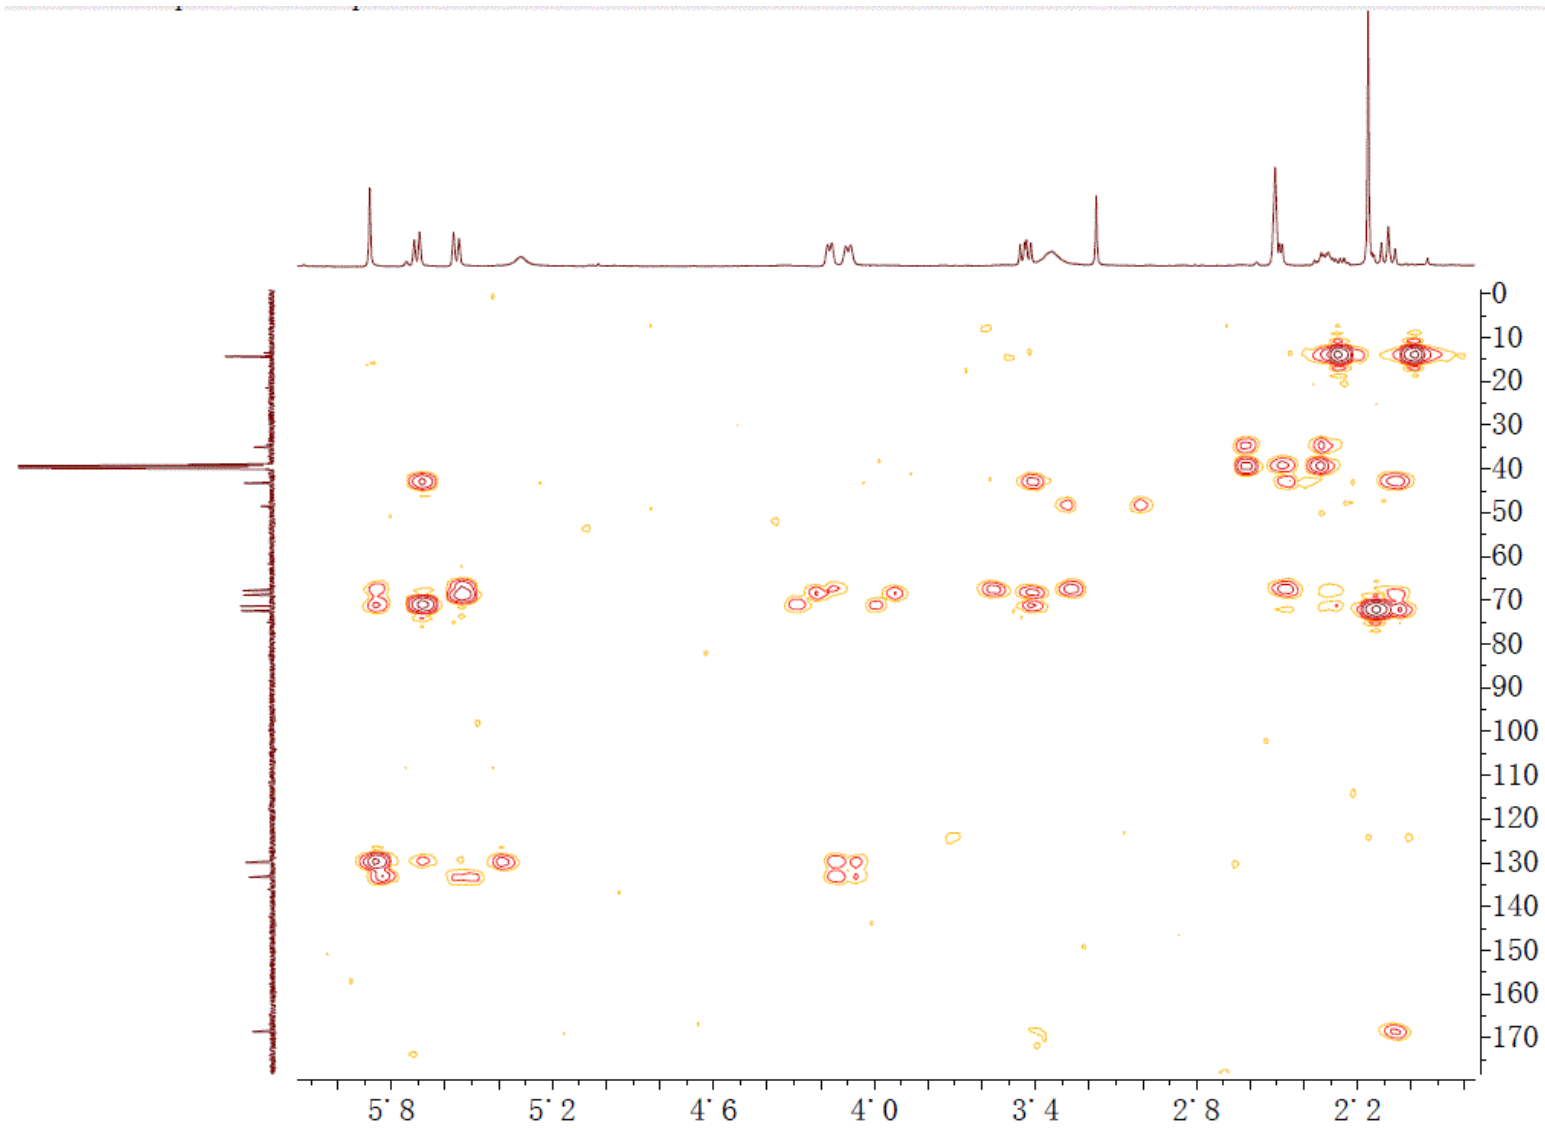

Figure S19. HMBC spectrum of compound 3.

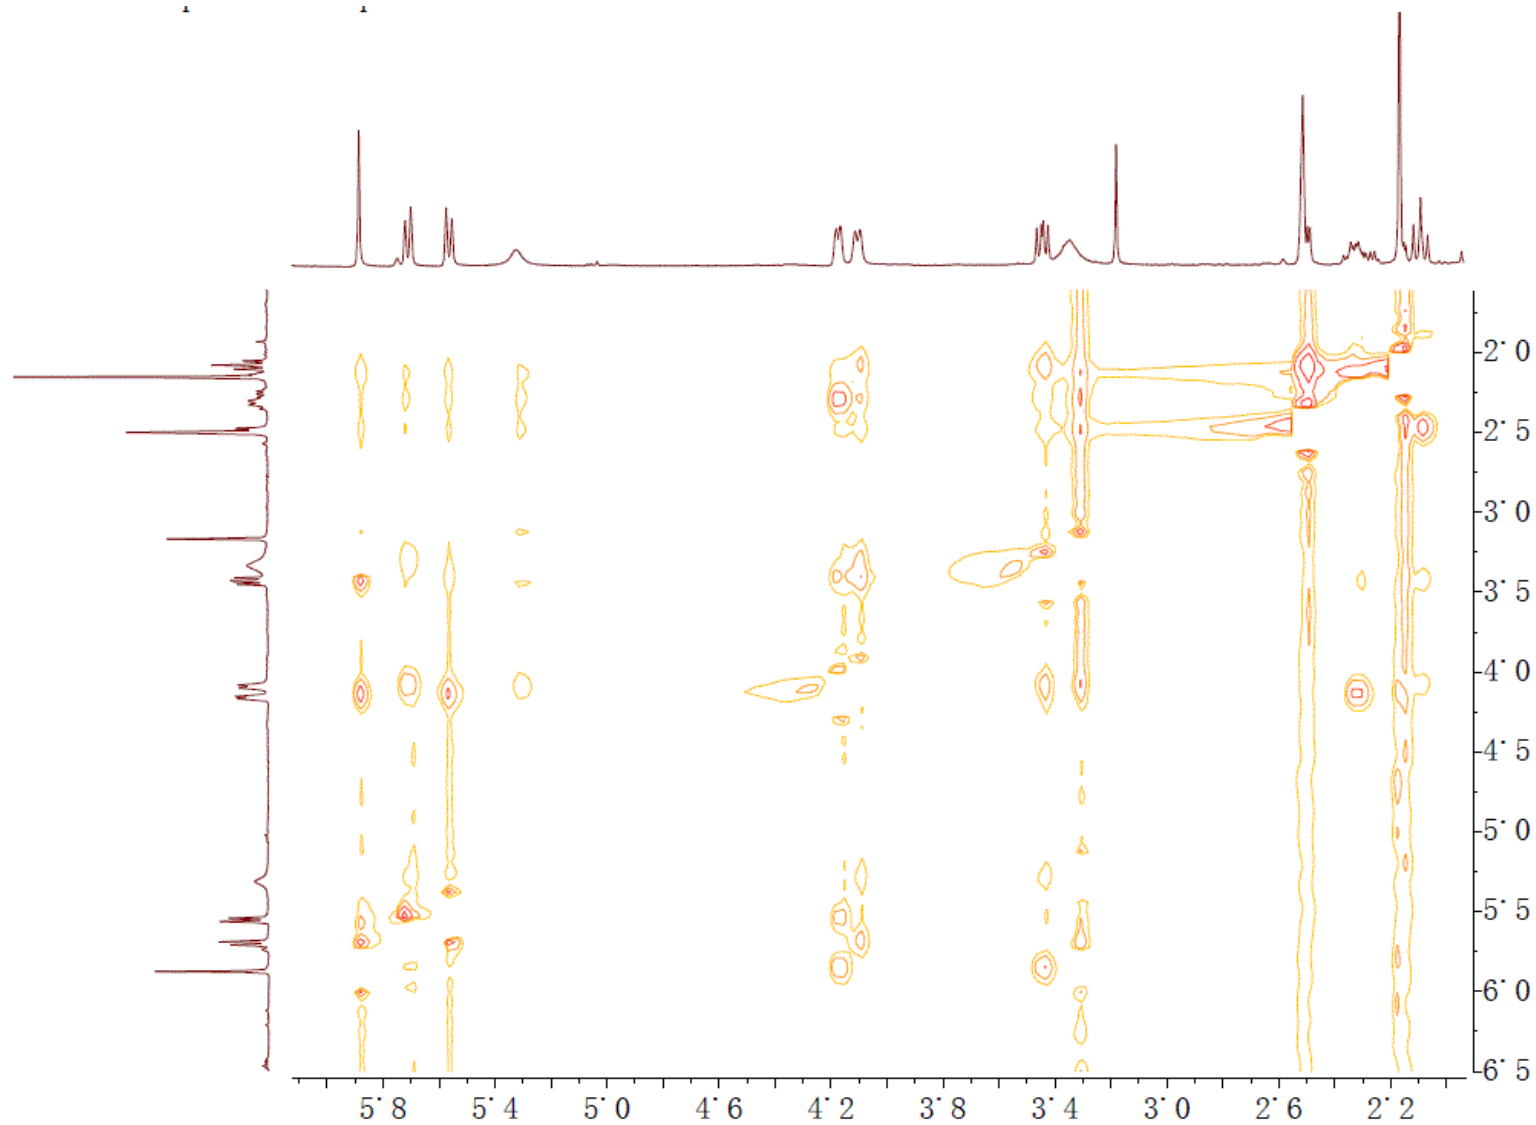

Figure S20. NOESY spectrum of compound 3.

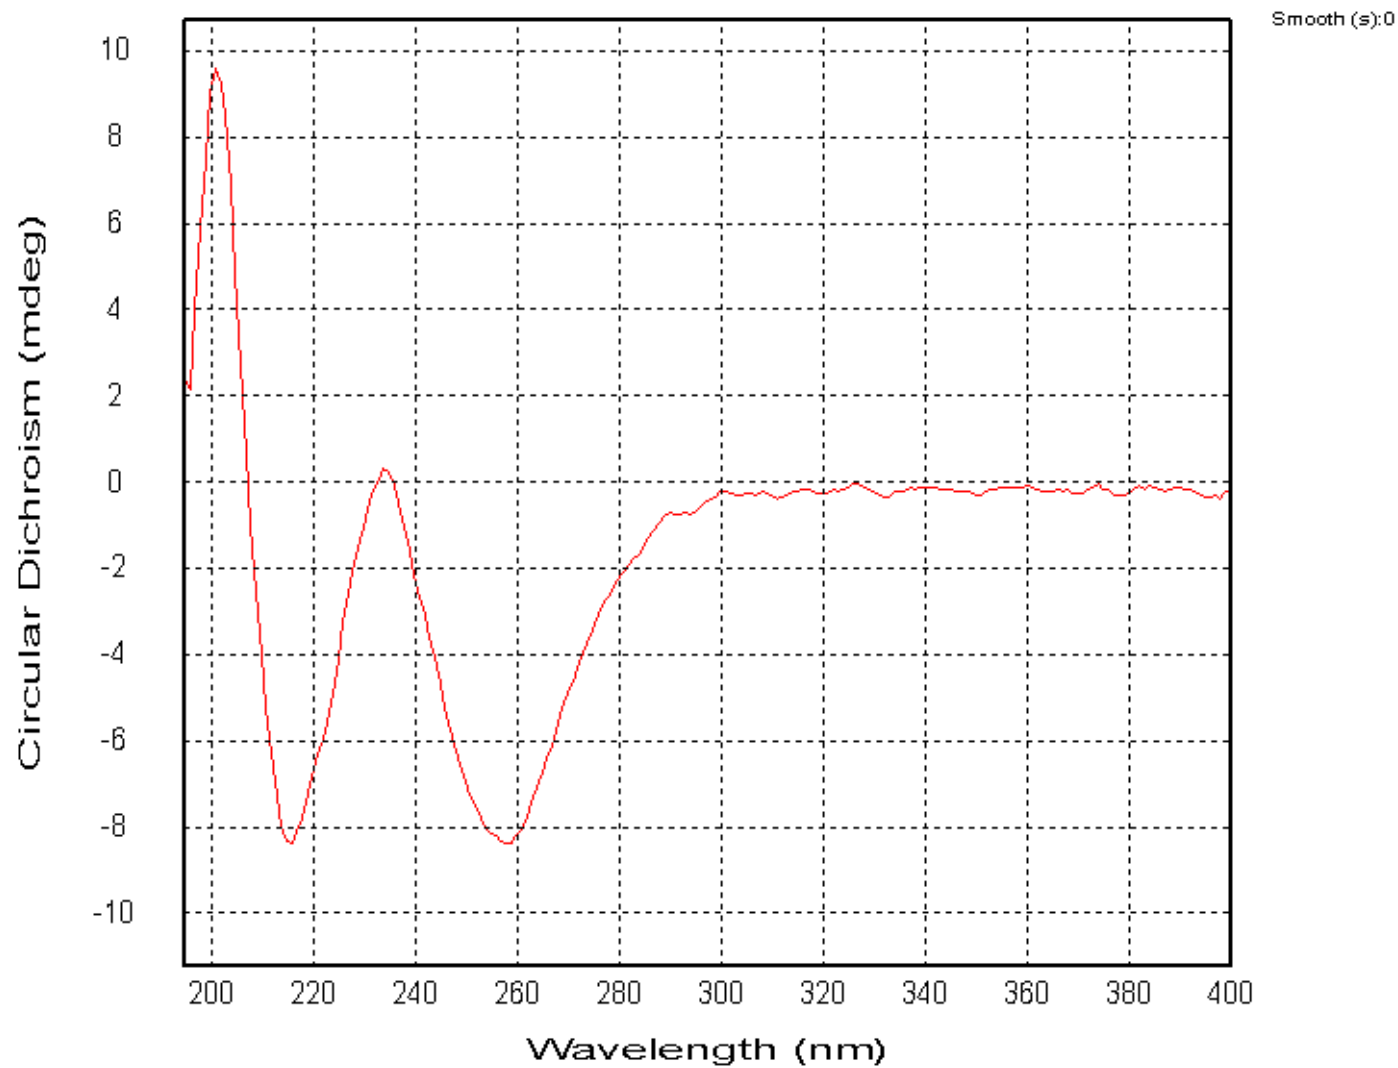

Figure S21. CD spectrum of compound 3.

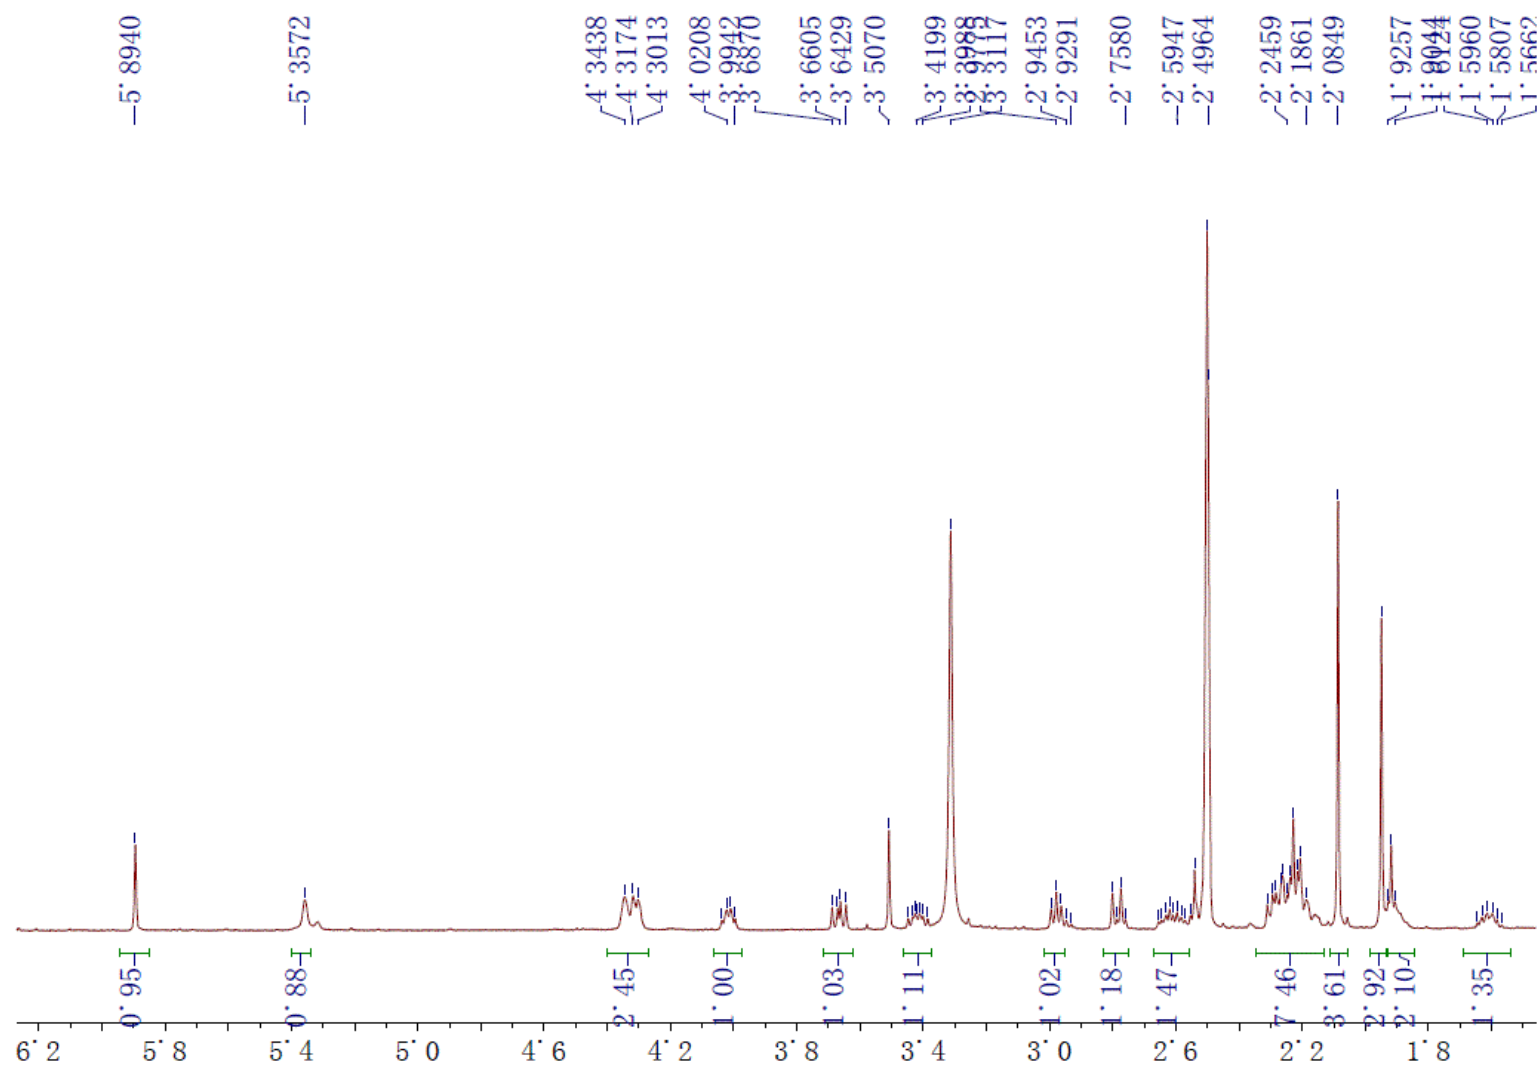

Figure S22. <sup>1</sup>H NMR (500 MHz, DMSO-*d*<sub>6</sub>) spectrum of compound 4.

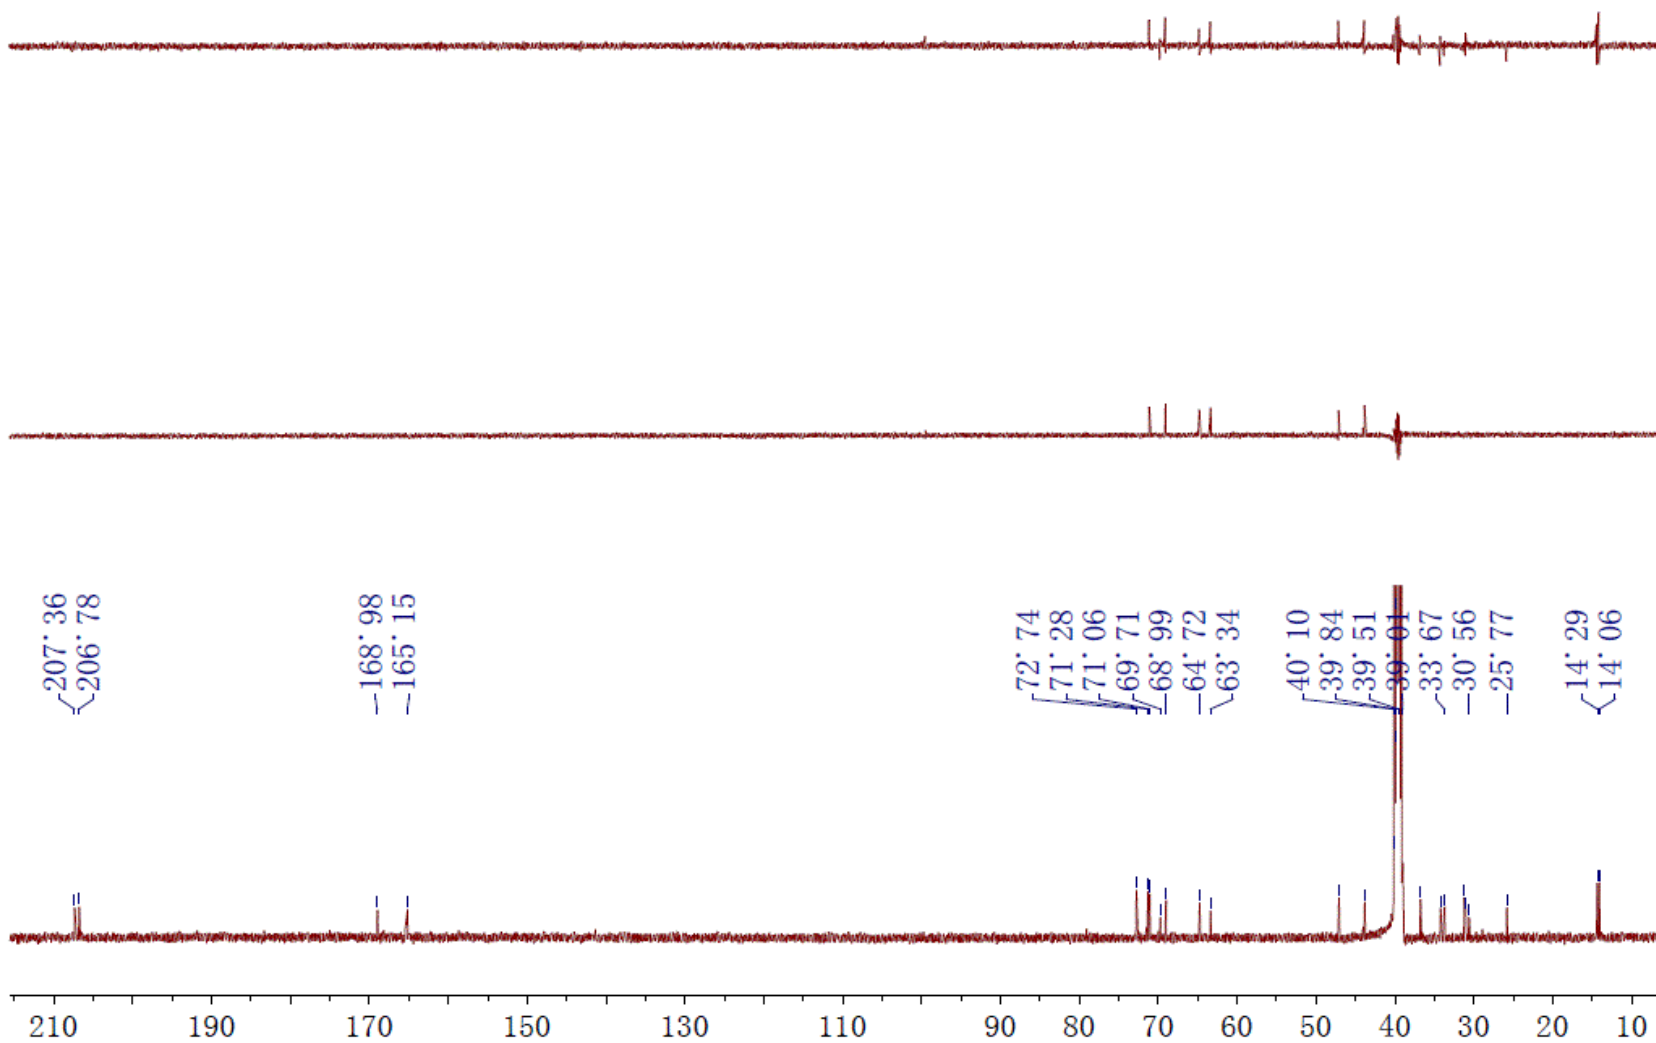

**Figure S23.**  $^{13}\text{C}$  NMR (125 MHz,  $\text{DMSO-}d_6$ ) and DEPT spectra of compound 4.

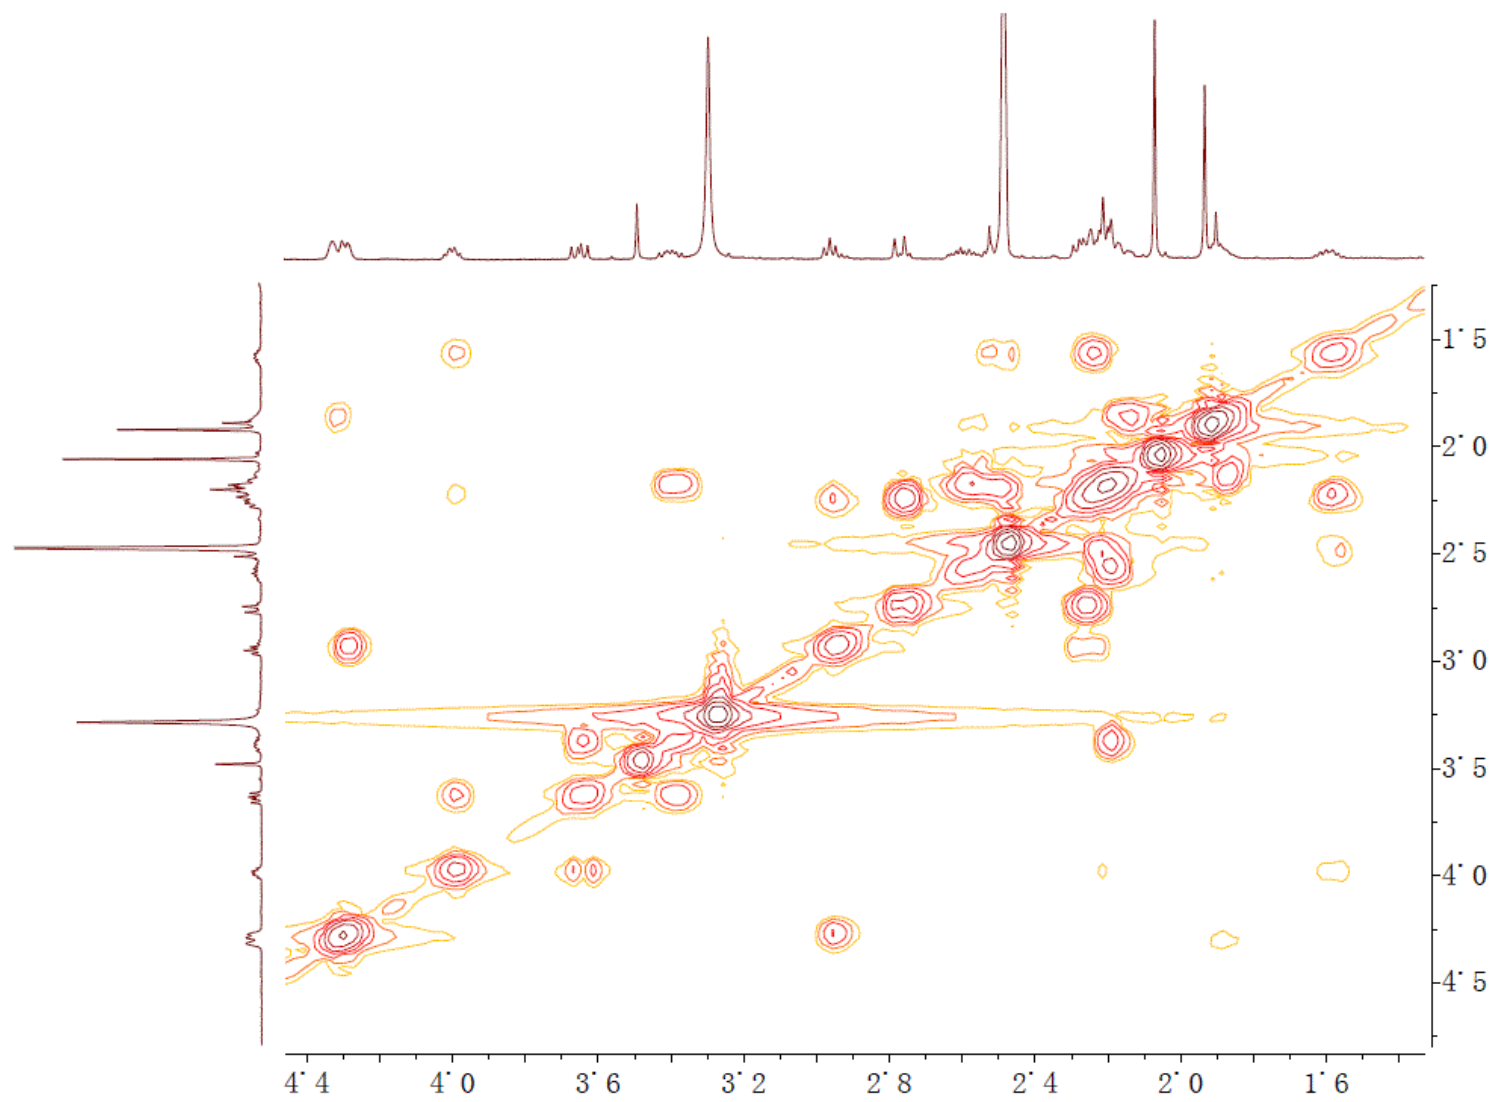

**Figure S24.**  $^1\text{H}$ - $^1\text{H}$  COSY spectrum of compound 4.



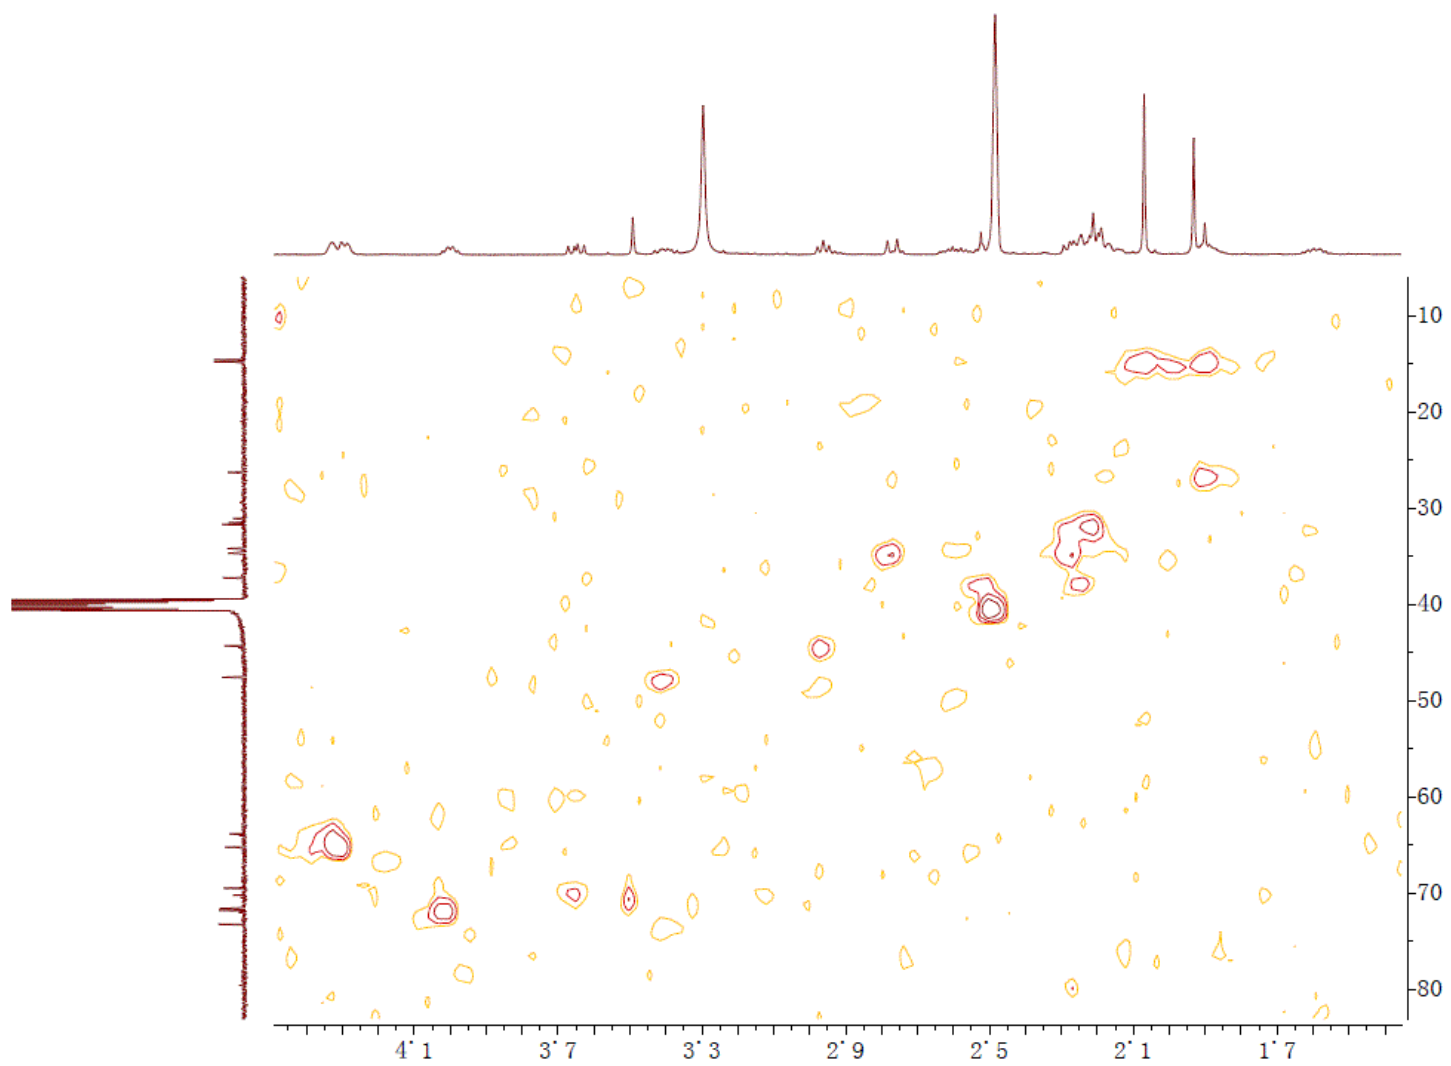

Figure S25. HSQC spectrum of compound 4.

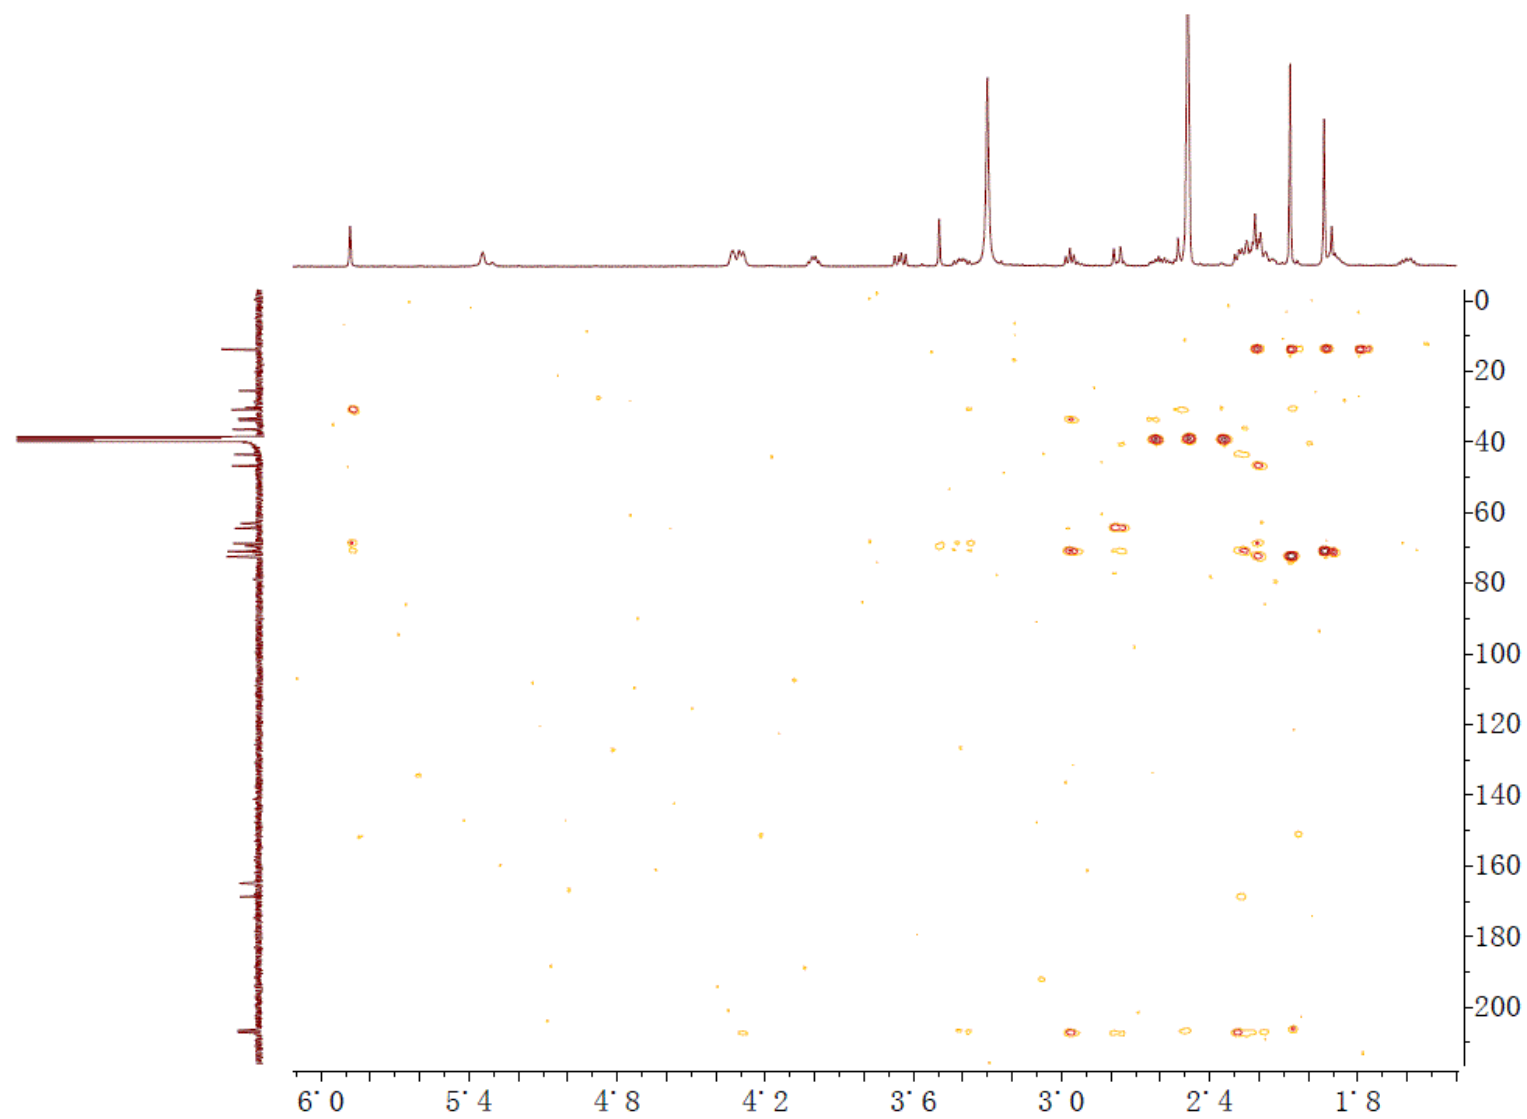

Figure S26. HMBC spectrum of compound 4.

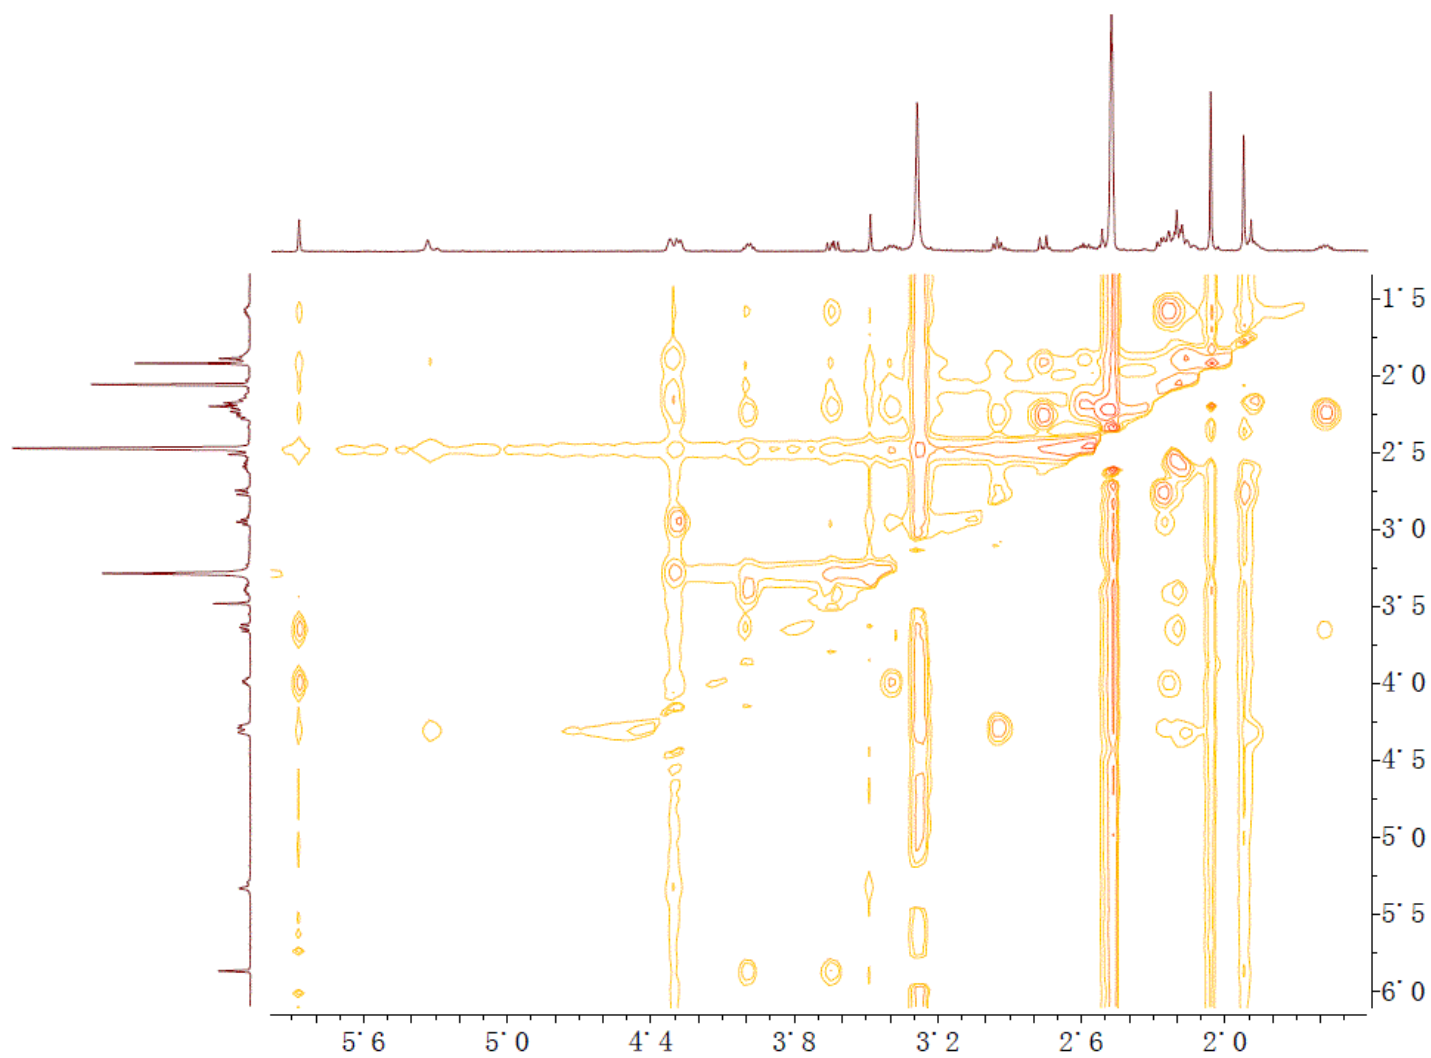

**Figure S27.** NOESY spectrum of compound **4**.

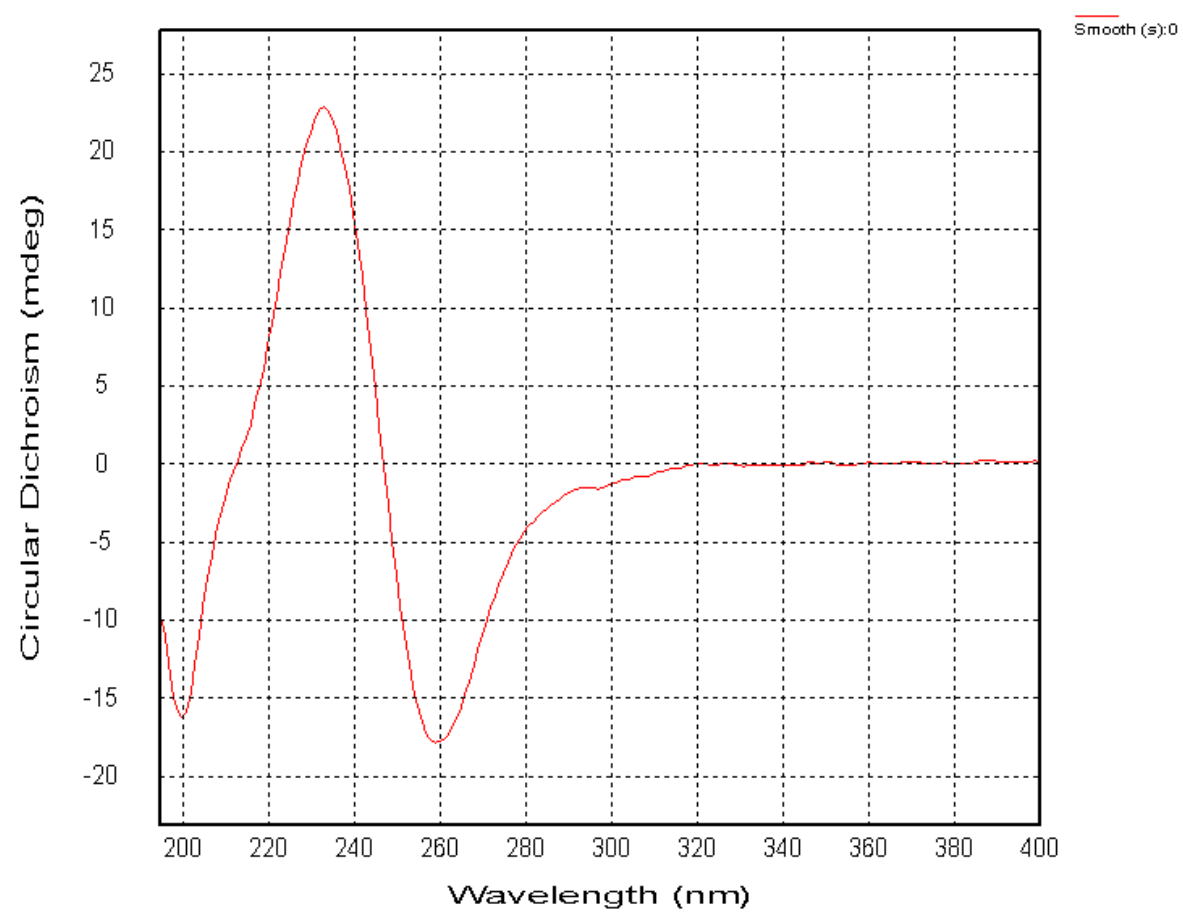

**Figure S28.** CD spectrum of compound 4.

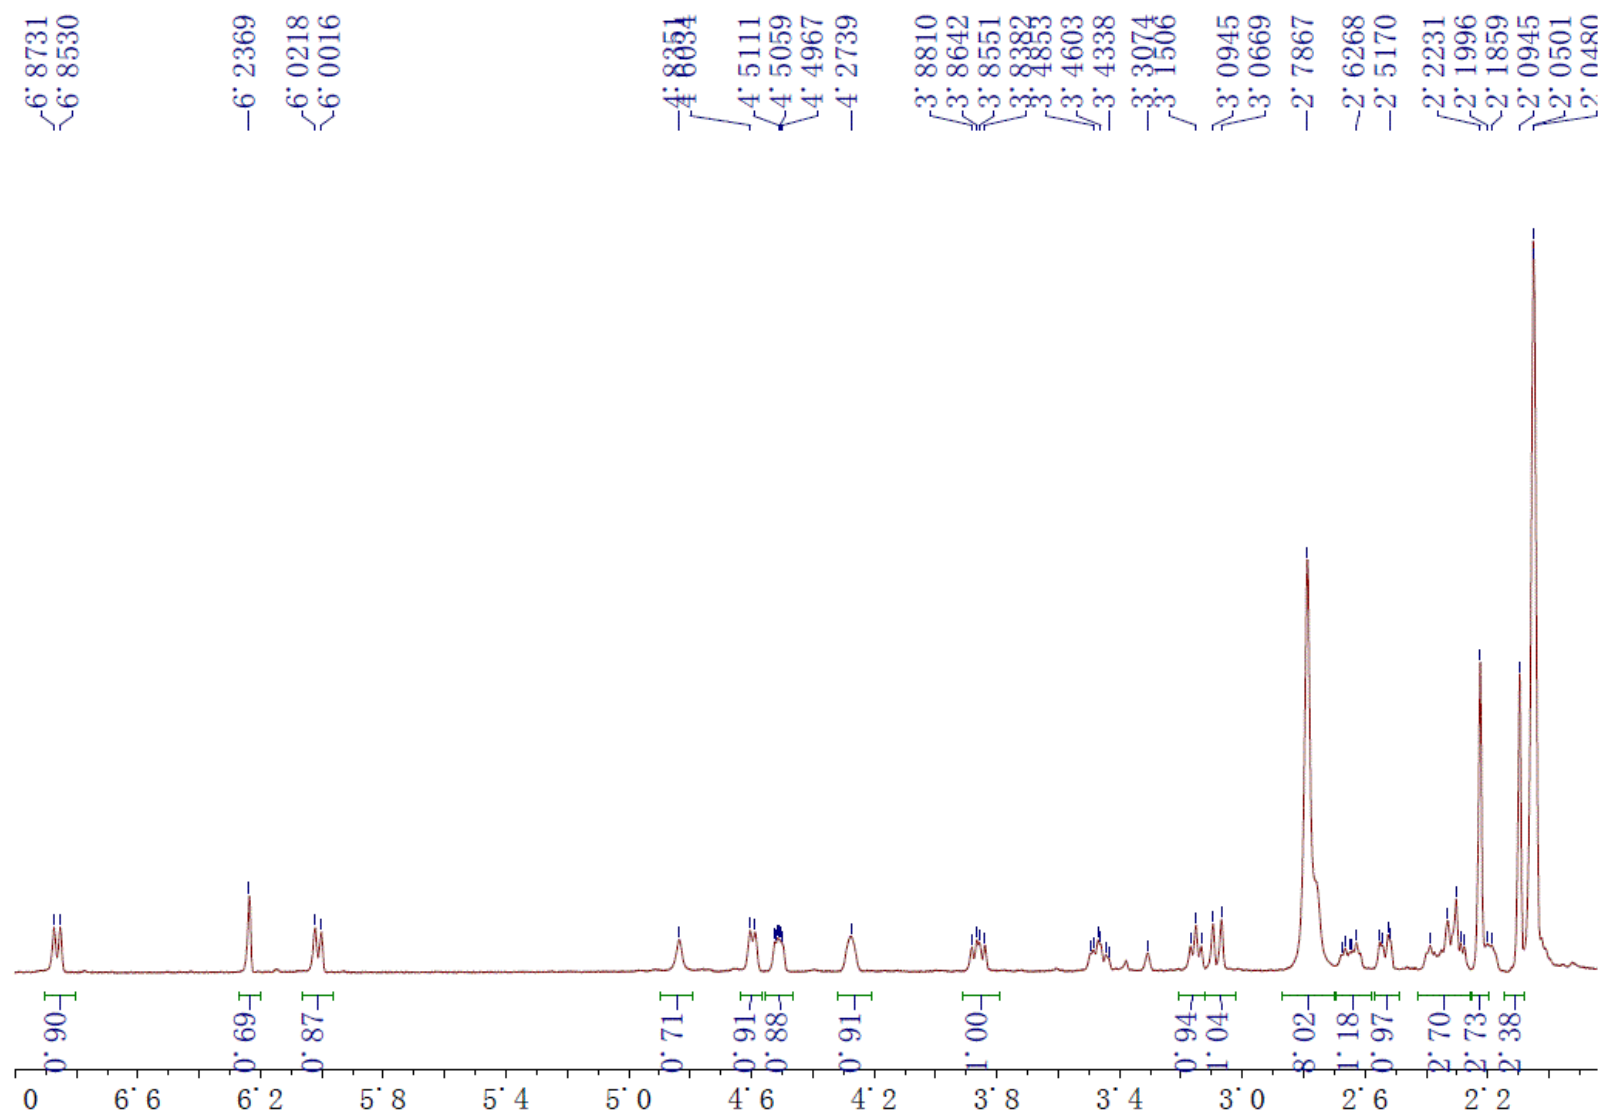

Figure S29.  $^1\text{H}$  NMR (500 MHz, Acetone- $d_6$ ) spectrum of compound 5.

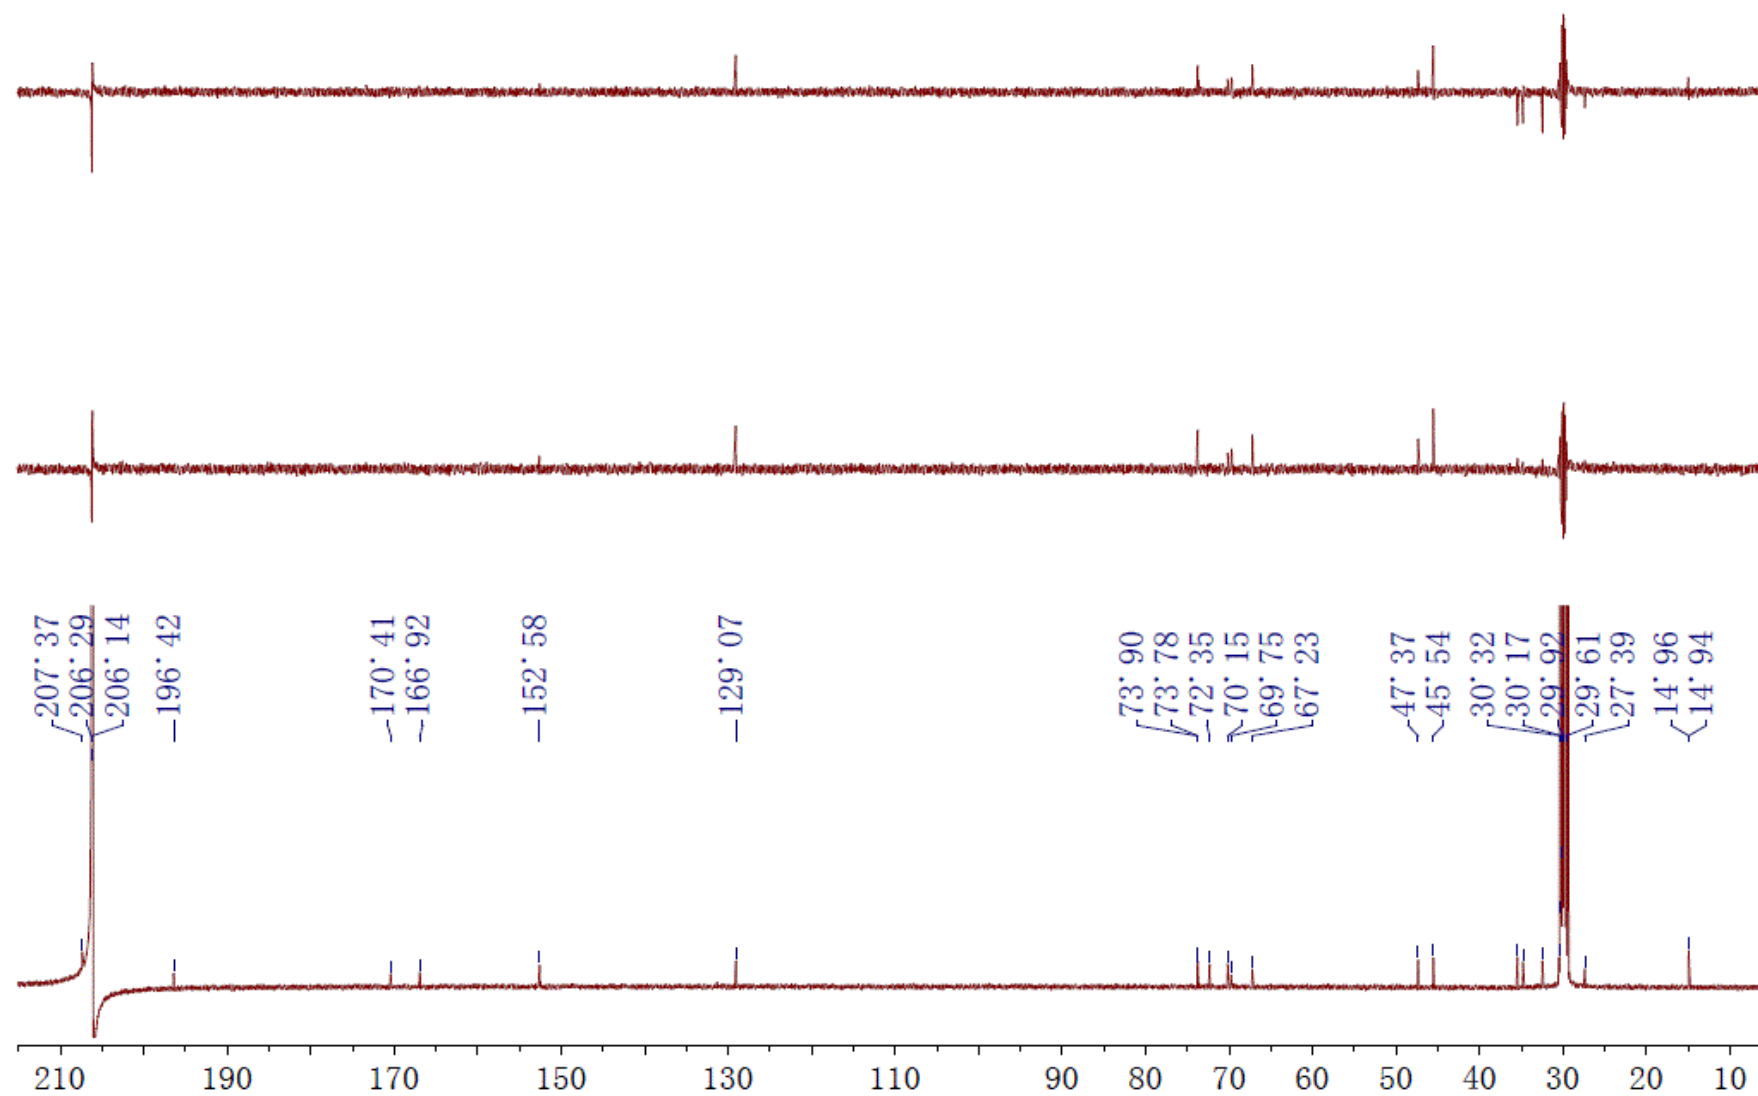

**Figure S30.**  $^{13}\text{C}$  NMR (125 MHz, Acetone- $d_6$ ) and DEPT spectra of compound 5.

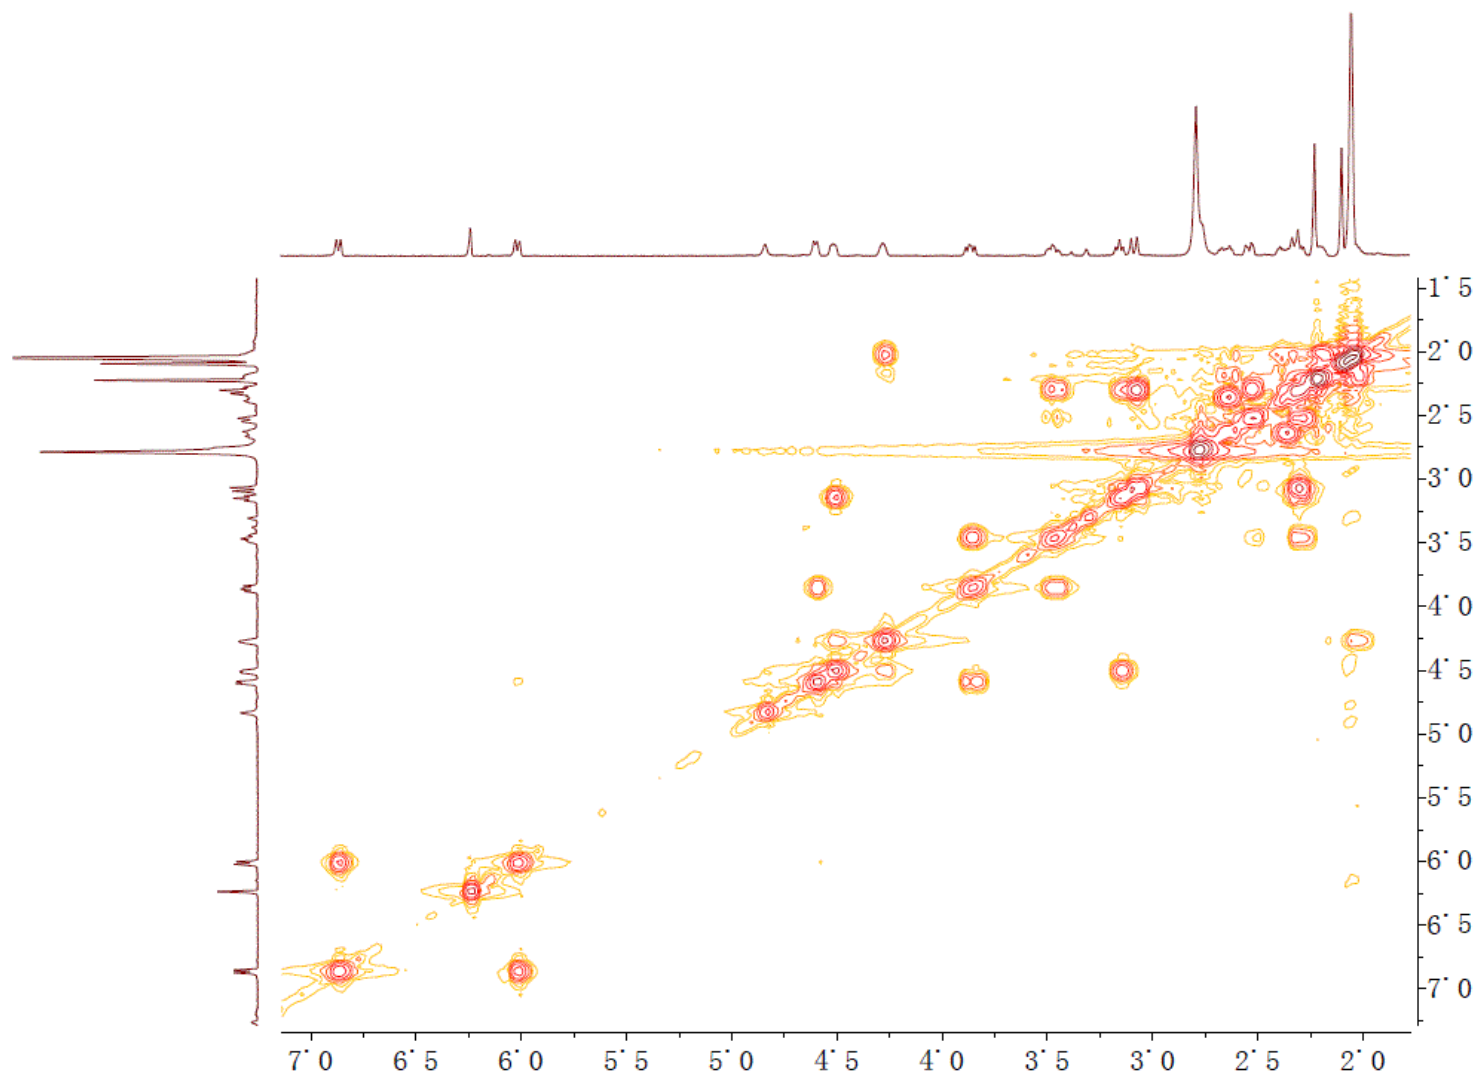

**Figure S31.**  $^1\text{H}$  -  $^1\text{H}$  COSY spectrum of compound **5**.

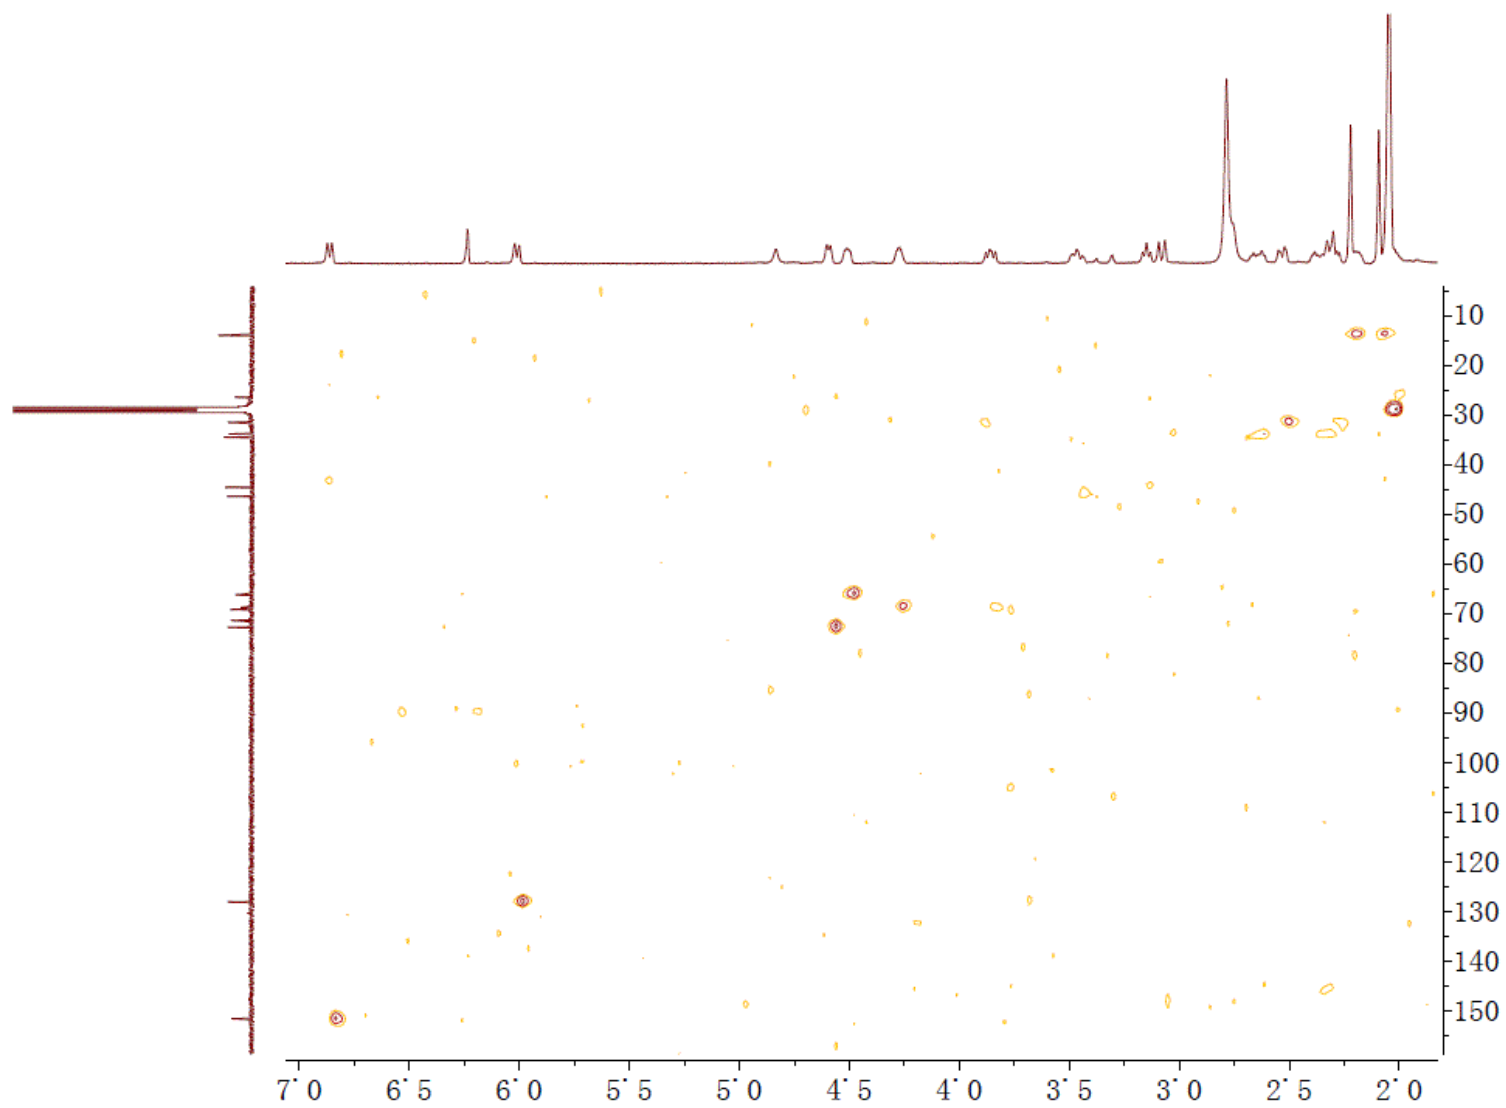

**Figure S32.** HSQC spectrum of compound 5.



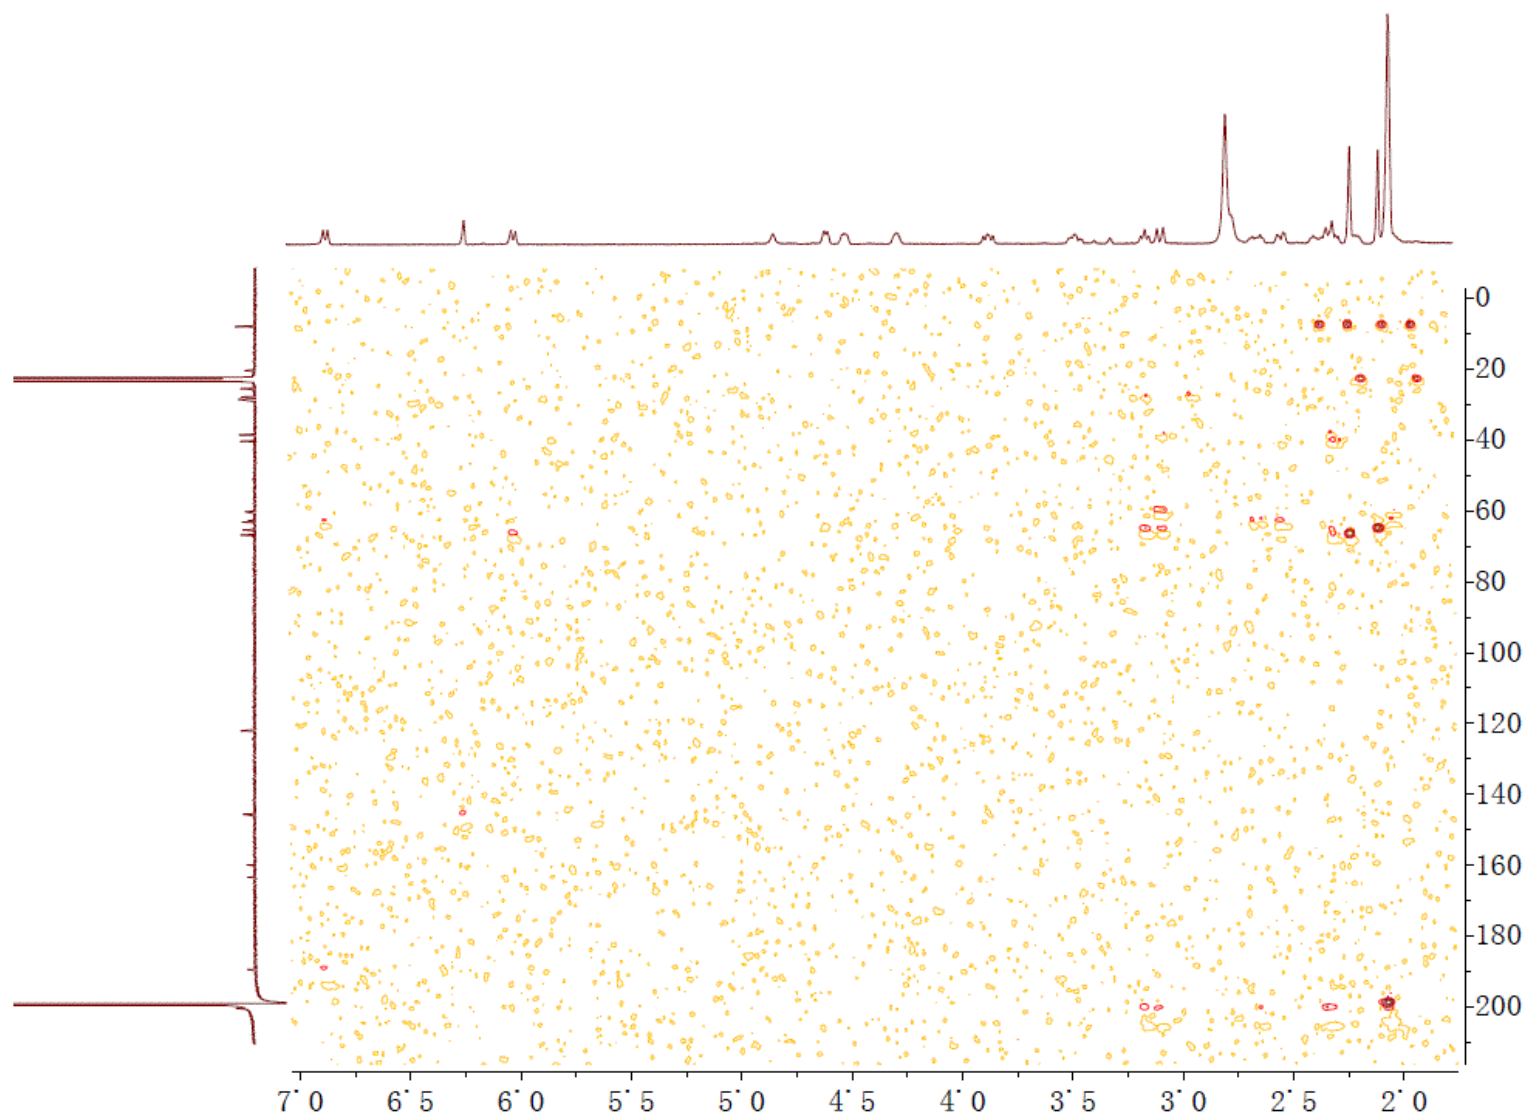

**Figure S33.** HMBC spectrum of compound 5.

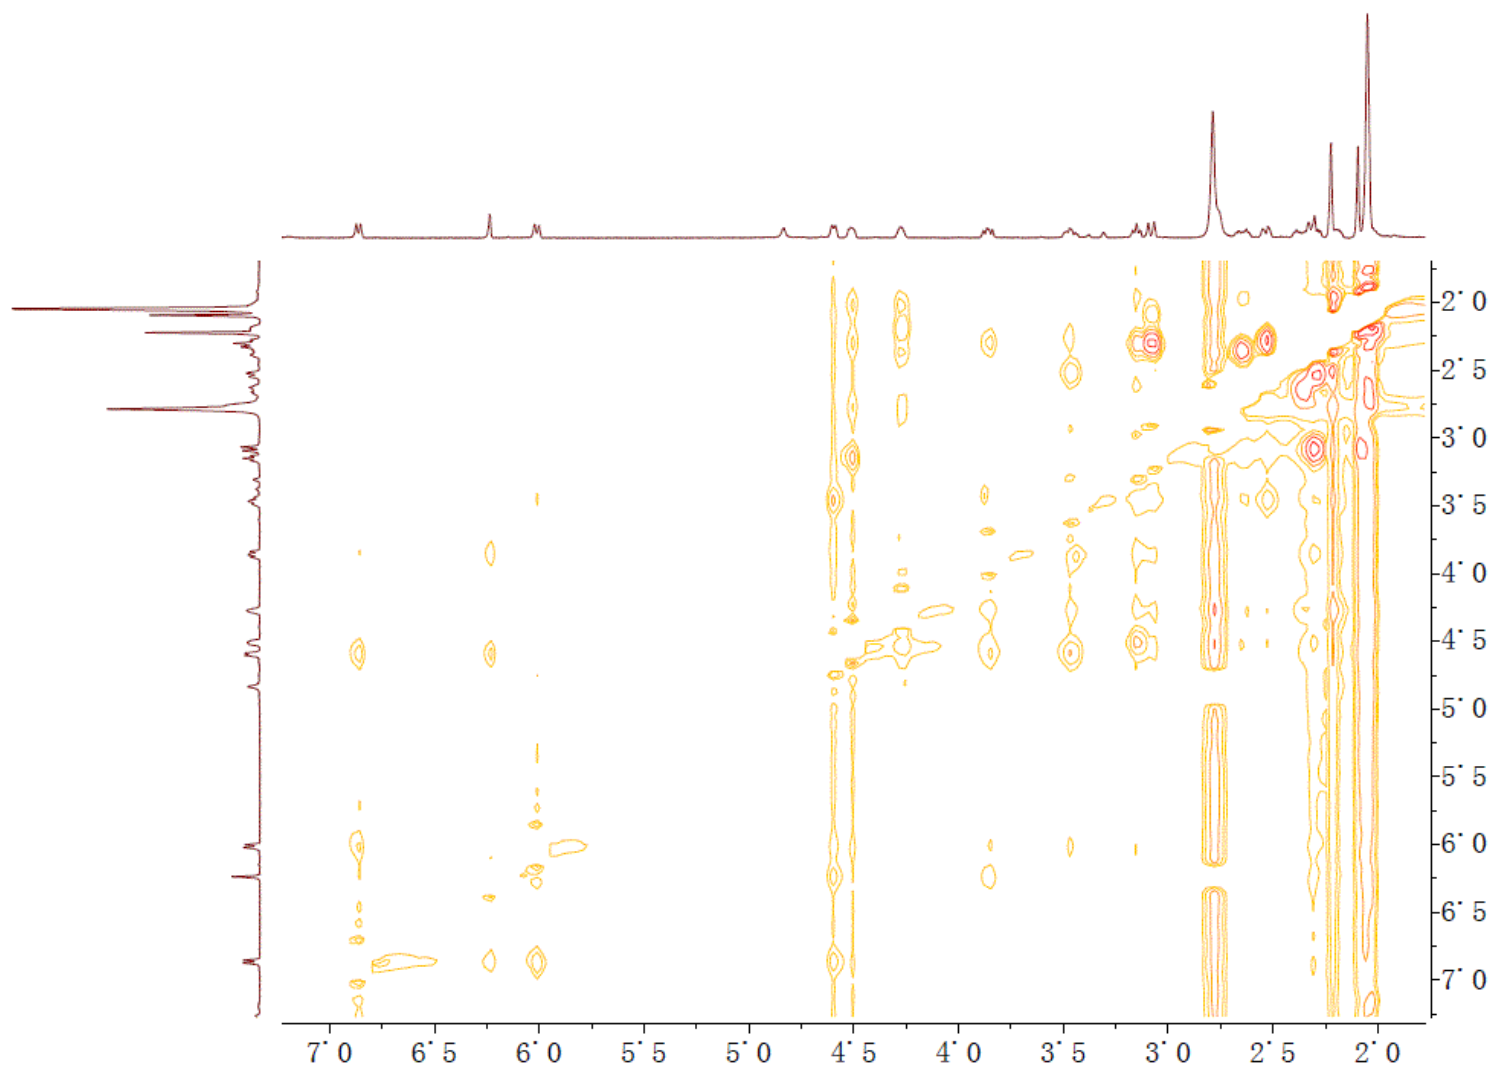

Figure S34. NOESY spectrum of compound 5.

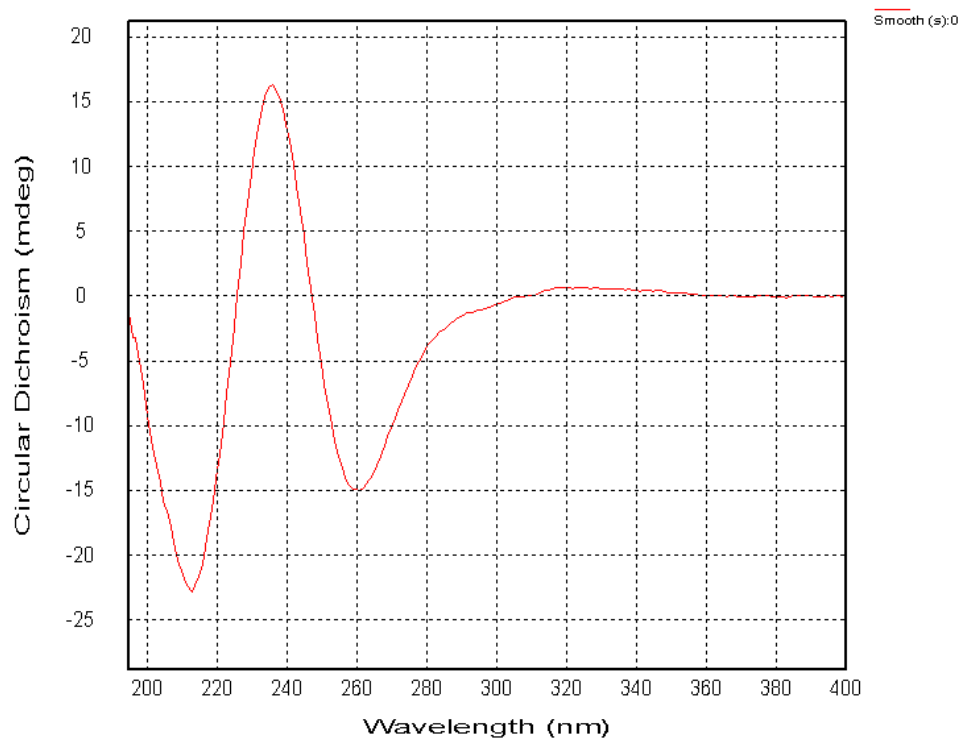

**Figure S35.** CD spectrum of compound 5.

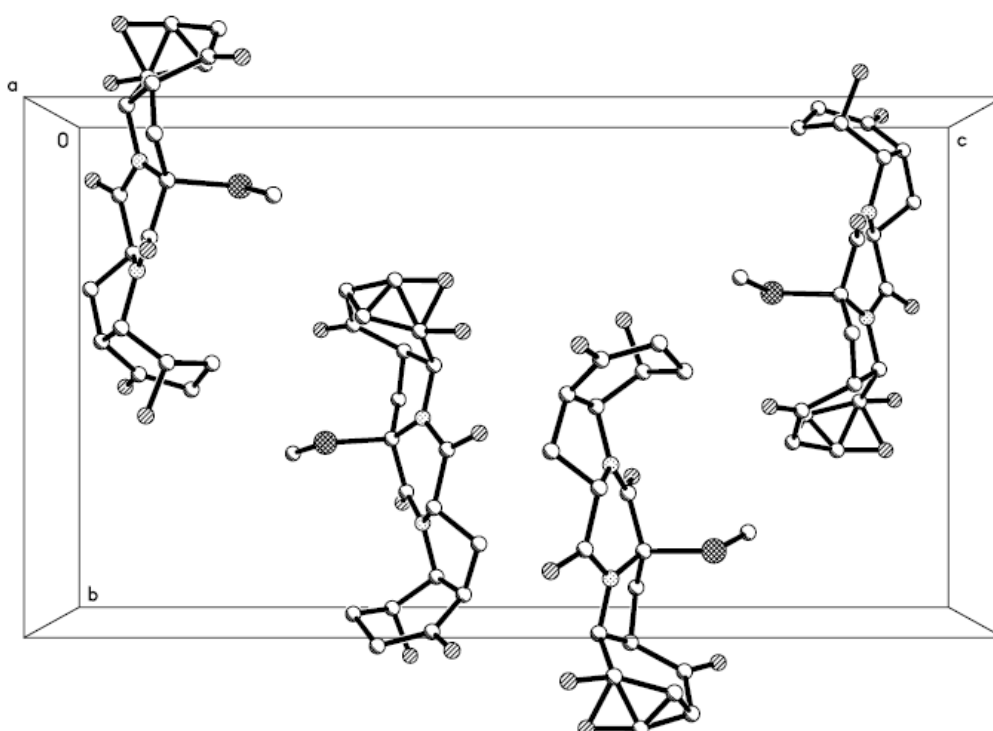

**Figure S36.** Crystal packing of compound 1 at 293(2) K.

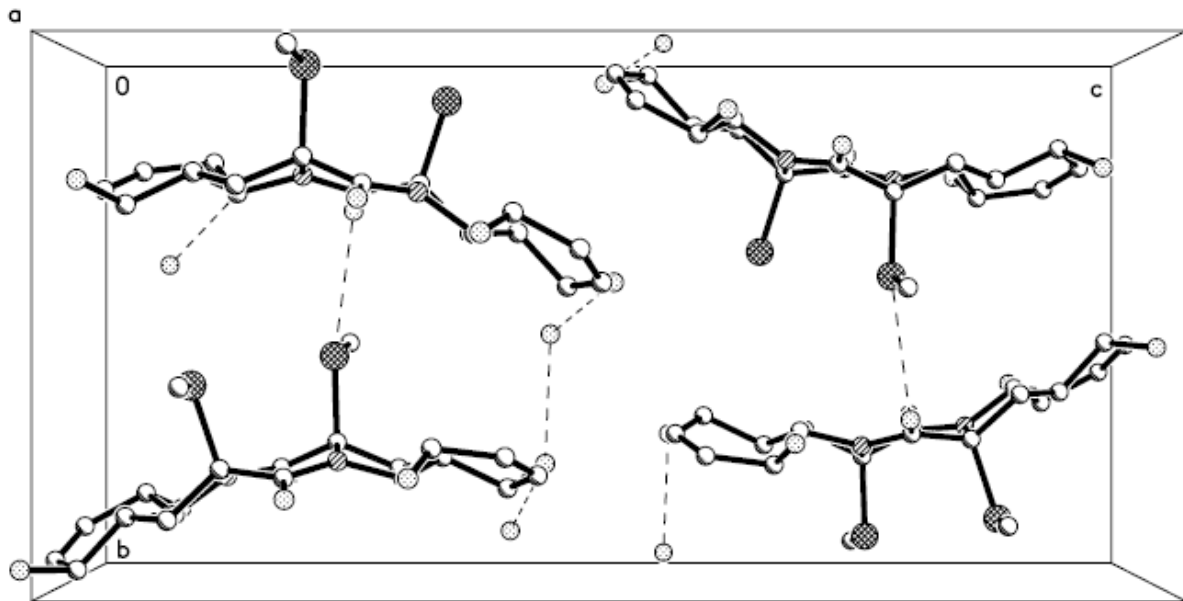

**Figure S37.** Crystal packing of compound **3** at 293(2) K.

```

ACCTCCACCCGTGTTTACCGTACCCTGTTGCTTCGGCGCGCCCGCCCTCGCGGCCGCCGGGGGCCTCCGCCCCGGGCCCGTGCCCGCC
GAAGACACCCCTGAACGCTGTCTGAAGATTGCTGCTGAGCGAATAGCGAAAAATAAGTTAAACTTTCAACAACGGATCTCTTGGTTCC
GGCATCGATGAAGAACGCAGCGAAATGCGATAACTAATGTGAATTGCAGAATTCAGTGAATCATCGAGTCTTTGAACGCACATTGCGCCC
CCTGGTATTCGGGGGGCATGCCTGTCCGAGCGTCATTGCTGCCCTCAAGCCCGGCTTGTGTGTTGGGCGCCGTCCCCCCTTCCCGGGG
GGACGGGCCCCGAAAGGCAGCGGCGGCACCGCGTCCGGTCTCTGAGCGTATGGGGCTCTGTACCCCGCTCTGCAGGCCCGGCCGGCGCCA
GCCGACCCCATCATCCTTTTTTTCAGGTTGACCTCGGATCA

```

**Figure S38.** ITS sequence of MA231.

© 2015 by the authors; licensee MDPI, Basel, Switzerland. This article is an open access article distributed under the terms and conditions of the Creative Commons Attribution license (<http://creativecommons.org/licenses/by/4.0/>).
